# Supplementary material for: Hydrothiolation of alkynes with thiol–catechol derivatives catalysed by CuNPs/TiO2: exploring the reaction mechanism by DFT calculations
Source: Royal Society of Chemistry journal article supplement (doi:10.1039/d3ra00169e), 2023-01-01
Supplement: d3ra00169e1.pdf [file d3ra00169e1.pdf]

## Supporting Information for

### Hydrothiolation of alkynes with thiol-catechol derivatives catalysed by CuNPs/TiO<sub>2</sub>: exploring the reaction mechanism by DFT calculations

Matías Capurso, Gabriel Radivoy, Fabiana Nador and Viviana Dorn\*

#### Index

|                   |                                                                                                                                                                                                                                                                                                                   |    |
|-------------------|-------------------------------------------------------------------------------------------------------------------------------------------------------------------------------------------------------------------------------------------------------------------------------------------------------------------|----|
| <b>S1.</b>        | Representative procedure for the synthesis of CuNPs/support catalysts.....                                                                                                                                                                                                                                        | 2  |
| <b>S2.</b>        | Study of the TYC reaction with different CuNPs/support catalysts [1] .....                                                                                                                                                                                                                                        | 2  |
| <b>S3.</b>        | General computational procedures .....                                                                                                                                                                                                                                                                            | 2  |
| <b>Figure S1.</b> | PBE0-D3BJ / Def2-TZVP / CPCM=DCM potential energy profile (kcal/mol) for the thiol deprotonation, nucleophilic addition and protonation steps in the formation of <i>Z</i> -vinyl sulphide derived from thiol-catechol 1 and dimethyl acetylenedicarboxylate. Interatomic distances (Å) are detailed in blue..... | 4  |
| <b>Figure S2.</b> | PBE0-D3BJ / Def2-TZVP / CPCM=DCM potential energy profile (kcal/mol) for the thiol deprotonation, nucleophilic addition and protonation steps in the formation of <i>E</i> -vinyl sulphide derived from thiol-catechol 1 and dimethyl acetylenedicarboxylate. Interatomic distances (Å) are detailed in blue..... | 4  |
| <b>S4.</b>        | Cartesians coordinates and Energies of Reactive and copper catalysts structures.....                                                                                                                                                                                                                              | 5  |
| <b>S5.</b>        | Cartesians coordinates, first frequency for TS and Energies of Z-RC, IN-1, TS-1, IN-2, TS-2, Z-PC, Z-VS ( <i>Z</i> -vinyl sulphide derived from propiolamide).....                                                                                                                                                | 8  |
| <b>S6.</b>        | Cartesians coordinates, first frequency for TS and Energies of E-RC, IN-3, TS-3, IN-4, TS-4, E-PC, E-VS ( <i>E</i> -vinyl sulphide derived from propiolamide) .....                                                                                                                                               | 13 |
| <b>S7.</b>        | Cartesians coordinates, first frequency for TS and Energies of Z-RC', IN-1', TS-1', IN-2', TS-2', Z-PC', Z-VS' ( <i>Z</i> -vinyl sulphide derived from dimethyl acetylenedicarboxylate) .....                                                                                                                     | 18 |
| <b>S8.</b>        | Cartesians coordinates, first frequency for TS and Energies of E-RC', IN-3', TS-3', IN-4', TS-4', E-PC', E-VS' ( <i>E</i> -vinyl sulphide derived from dimethyl acetylenedicarboxylate).....                                                                                                                      | 24 |
| <b>References</b> | .....                                                                                                                                                                                                                                                                                                             | 30 |

### S1. Representative procedure for the synthesis of CuNPs/support catalysts

Anhydrous copper(II) chloride (134 mg, 1 mmol) was added to a suspension of lithium (21 mg, 3 mmol) and 4,4-di-tert-butylbiphenyl (DTBB, 27 mg, 0.1 mmol) in THF (3 mL) at room temperature under a nitrogen atmosphere. The reaction mixture, which was initially brown, rapidly changed to black, indicating that the suspension of copper nanoparticles was formed. This suspension was diluted with THF (3 mL) followed by the addition of 0.8 g of the corresponding support (ZnO, basic Al<sub>2</sub>O<sub>3</sub>, MgO, C\*, Cellulose, MCM41, Zy). The resulting mixture was stirred for 1 h at room temperature, quenched with water and then filtered. The solid was successively washed with EtOH (15 mL) and dried under vacuum.

### S2. Study of the TYC reaction with different CuNPs/support catalysts [1]

For this study, thiol **1** (0.2 mmol) and alkyne **2** (0.2 mmol) were added to a reaction tube containing CuNPs/support catalyst (60 mg) in 1,2-DCE (2 mL) under air. The reaction mixture was heated at 80 °C for 48 h. The catalyst was removed by filtration and washed with hexane-AcOEt. Finally, the filtrate was concentrated under vacuum and the reaction crude was analysed by <sup>1</sup>H NMR. The results obtained are shown in **Table S1**.

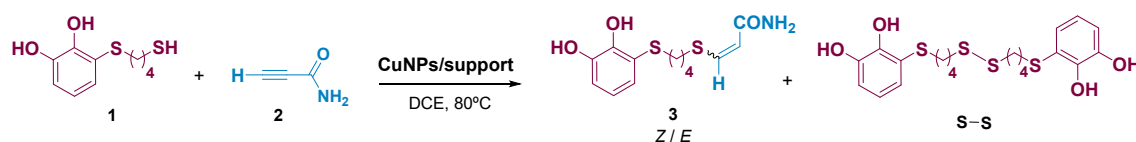

**Table S1.** TYC reaction with different catalysts

| Entry | Catalyst                             | Conv. Z + E (%) | Conv. S-S (%) | Selectivity Z : E |
|-------|--------------------------------------|-----------------|---------------|-------------------|
| 1     | CuNPs/TiO <sub>2</sub>               | 87              | 10            | 86:14             |
| 2     | CuNPs/ZnO <sup>a</sup>               | 72              | -             | 85:15             |
| 3     | CuNPs/Al <sub>2</sub> O <sub>3</sub> | 68              | 25            | 95:5              |
| 4     | CuNPs/MgO                            | 47              | -             | 88:12             |

General conditions: alkyne **1** (0.1 mmol), thiol **2** (0.1 mmol), catalyst (30 mg), DCE (1mL) and heating at 80 °C.

<sup>a</sup> other by-products.

### S3. General computational procedures

Calculations were performed with ORCA version 4.2.1 [2]. All geometries were optimised in the gas phase using the PBE density functional theory method [3] with D3BJ dispersion correction [4] and the double- $\zeta$  def2-SVP basis set for all atoms. [5] For open-shell systems, the unconstrained formalism was adopted. Harmonic frequency calculations were carried out at the same level of theory in order to identify each stationary point as either a minimum (no imaginary frequency) or a transition state (one single imaginary frequency). The transition states were obtained using scan or NEB [6] keywords followed by the corresponding optTS calculations.

The electronic energies were then improved through single point calculations using the hybrid-GGA functional PBE0 [7], and triple- $\zeta$  def2-TZVP basis set [5]. Solvent effects were introduced through the implicit solvation model CPCM [8] for the experimental solvent dichloromethane (DCM) with a dielectric constant of 9.08 as provided for the library of solvents of ORCA 4.2.1.

Electronic energies of structures IN-1, TS-1, IN-2, IN-3, TS-3 and IN-4 were also obtained with B3LYP [9] functional applying the D3BJ dispersion correction as implemented in ORCA 4.2.1, and the 6-311+G\* basis set for all atoms. Solvent effects were introduced in the same way as with the aforementioned methodology.

The molecular images presented were obtained with Chemcraft [10], non-relevant hydrogens were removed for clearer viewing.

**Example of the ORCA input for geometry optimisation.**

```
! UKS OPT PBE D3BJ DEF2-SVP SlowConv PAL4
%scf
MaxIter 999
end
* xyz 0 2
coordinates
*
```

**Example of the ORCA input for single point energy calculations.**

```
! UKS SP PBE0 D3BJ DEF2-TZVP TightSCF CPCM(CH2Cl2) PAL4
%scf MaxIter 999 end
*xyz 0 2
coordinates
*
```

**Example of the ORCA input for NEB-TS calculations.**

```
! UKS NEB-TS PBE D3BJ DEF2-SVP PAL4
%NEB NEB_END_XYZFILE "filename.xyz"
END
* xyz 0 2
coordinates
*
```

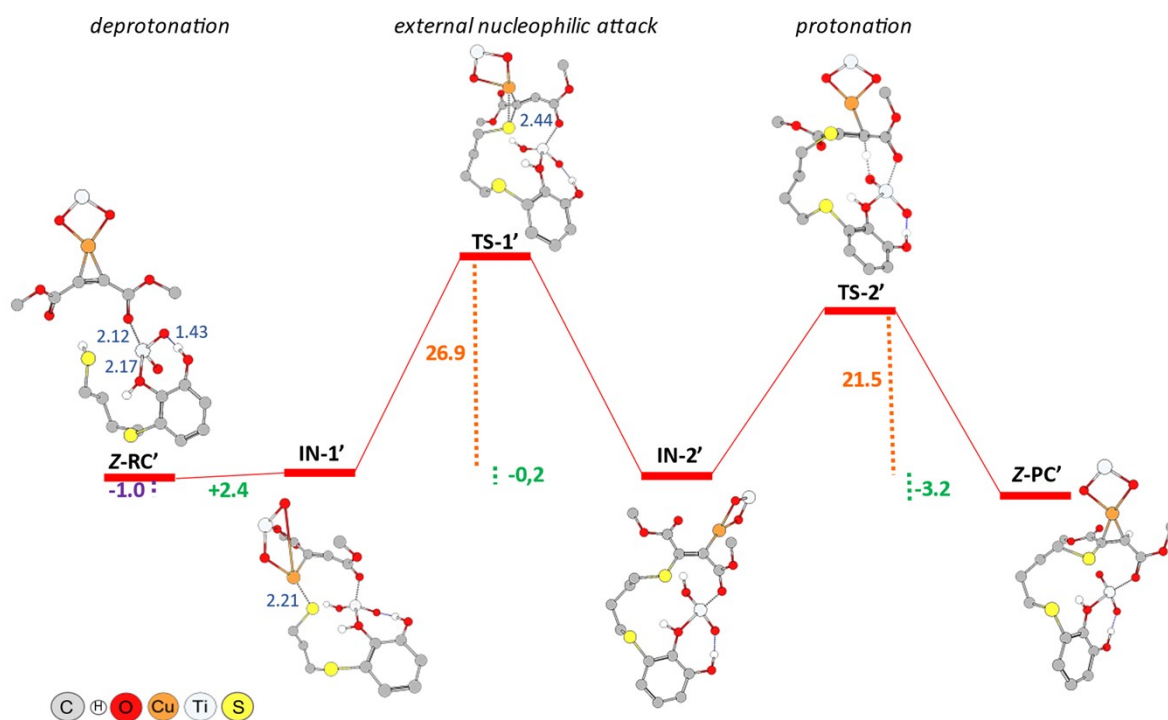

**Figure S1.** PBE0-D3BJ / Def2-TZVP / CPCM=DCM potential energy profile (kcal/mol) for the thiol deprotonation, nucleophilic addition and protonation steps in the formation of *Z*-vinyl sulphide derived from thiol-catechol 1 and dimethyl acetylenedicarboxylate. Interatomic distances (Å) are detailed in blue.

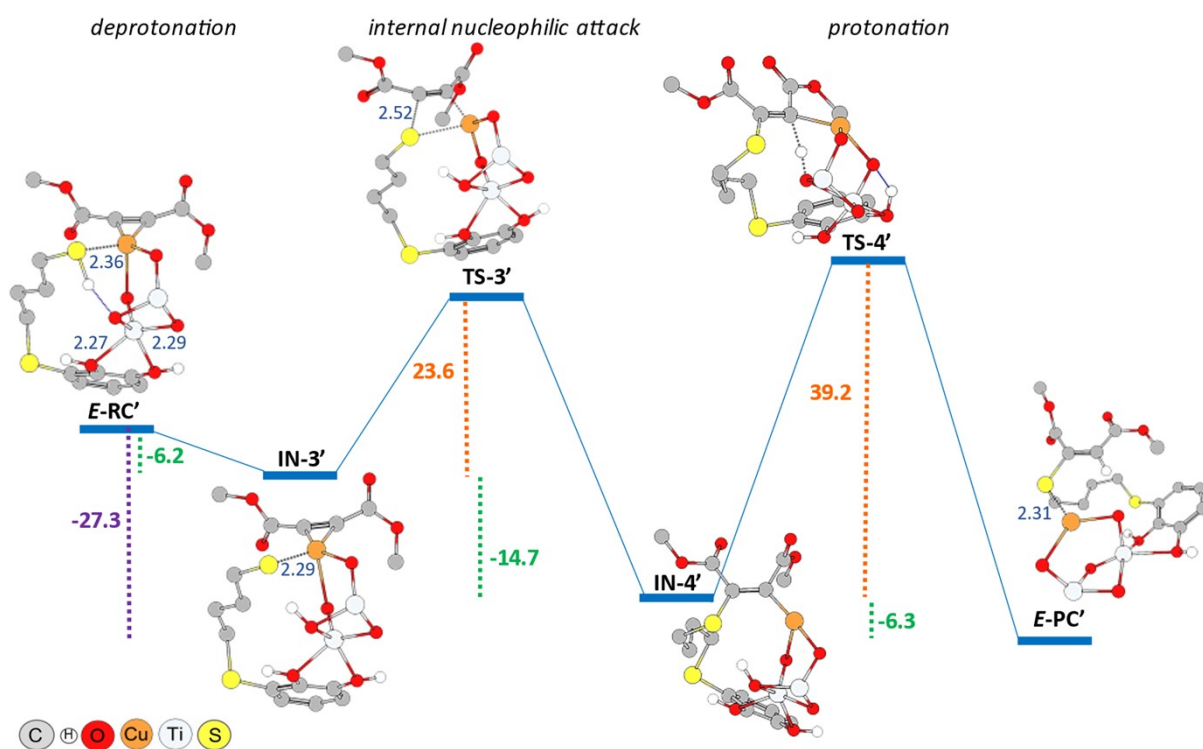

**Figure S2.** PBE0-D3BJ / Def2-TZVP / CPCM=DCM potential energy profile (kcal/mol) for the thiol deprotonation, nucleophilic addition and protonation steps in the formation of *E*-vinyl sulphide derived from thiol-catechol 1 and dimethyl acetylenedicarboxylate. Interatomic distances (Å) are detailed in blue.

#### S4. Cartesians coordinates and Energies of Reactive and copper catalysts structures

##### propiolamide

Energy: -245.87096446075Eh

0 1

|   |          |          |          |
|---|----------|----------|----------|
| C | -4.46500 | 0.31193  | -0.00000 |
| C | -3.26445 | 0.47851  | 0.00001  |
| H | -5.52819 | 0.17877  | 0.00004  |
| C | -1.83008 | 0.74915  | -0.00007 |
| O | -1.38080 | 1.89015  | 0.00005  |
| N | -1.05422 | -0.37577 | -0.00002 |
| H | -1.46464 | -1.30138 | -0.00006 |
| H | -0.04570 | -0.26775 | -0.00001 |

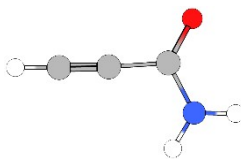

##### dimethyl acetylenedicarboxylate

Energy: -532.714858164127Eh

0 1

|   |          |          |          |
|---|----------|----------|----------|
| O | -2.72117 | 0.81405  | 0.45253  |
| O | 2.72117  | 0.81413  | -0.45212 |
| O | -2.53475 | -0.80024 | -1.14721 |
| O | 2.53478  | -0.79997 | 1.14781  |
| C | -4.14398 | 0.80033  | 0.26416  |
| C | 4.14399  | 0.80043  | -0.26379 |
| C | -2.03615 | -0.04890 | -0.32924 |
| C | 2.03616  | -0.04870 | 0.32979  |
| C | -0.60941 | 0.03192  | -0.07256 |
| C | 0.60943  | 0.03197  | 0.07303  |
| H | -4.40475 | 1.06286  | -0.78082 |
| H | -4.54998 | 1.55046  | 0.96479  |
| H | -4.56037 | -0.20297 | 0.48592  |
| H | 4.54997  | 1.55047  | -0.96452 |
| H | 4.56037  | -0.20290 | -0.48544 |
| H | 4.40479  | 1.06308  | 0.78116  |

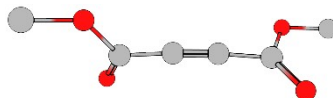

##### 3-((4-mercaptobutyl)thio)benzene-1,2-diol

Energy: -1335.70125443241 Eh

0 1

|   |          |          |          |
|---|----------|----------|----------|
| O | -3.21389 | 6.72090  | 1.49179  |
| O | -2.28299 | 4.98092  | -0.37609 |
| C | -2.55512 | 5.59337  | 1.89251  |
| C | -2.06609 | 4.68214  | 0.93854  |
| C | -2.35692 | 5.33757  | 3.24805  |
| C | -1.66931 | 4.18868  | 3.65452  |
| C | -1.18156 | 3.28228  | 2.71428  |
| C | -1.38834 | 3.52342  | 1.34825  |
| H | -0.63853 | 2.38895  | 3.02158  |
| H | -2.73983 | 6.05498  | 3.97473  |
| H | -1.51257 | 4.00523  | 4.71808  |
| S | -0.79272 | 2.44096  | 0.06960  |
| C | -2.26228 | 1.37593  | -0.21335 |
| S | -2.29408 | -2.07232 | -1.16518 |
| C | -3.34162 | -1.88978 | 0.32772  |
| C | -2.63758 | 0.50996  | 0.98554  |
| H | -1.99051 | 0.75890  | -1.08228 |
| H | -3.10773 | 2.01375  | -0.51086 |
| C | -3.78608 | -0.47042 | 0.67798  |
| H | -2.92162 | 1.17249  | 1.81594  |
| H | -1.74781 | -0.04404 | 1.33044  |
| H | -4.41185 | -0.07102 | -0.13699 |
| H | -4.44453 | -0.55008 | 1.55985  |
| H | -2.81083 | -2.35269 | 1.17189  |
| H | -4.21699 | -2.52028 | 0.11486  |
| H | -1.78631 | 4.28464  | -0.87939 |

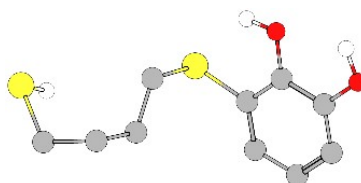

|   |          |          |          |
|---|----------|----------|----------|
| H | -3.22489 | 6.71420  | 0.51488  |
| H | -1.15589 | -1.58021 | -0.62317 |

### I structure

Energy: -2639.99196595291 Eh

O 2

|    |          |           |          |
|----|----------|-----------|----------|
| O  | 0.78849  | -0.532312 | -0.71564 |
| Ti | 1.414960 | 0.000611  | 0.80733  |
| O  | 0.93981  | -1.161681 | 1.99946  |
| Cu | 0.10161  | -2.020166 | 0.41323  |

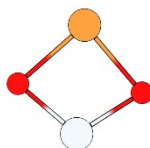

### II structure

Energy: -3639.86021355048 Eh

O 2

|    |          |           |           |
|----|----------|-----------|-----------|
| O  | 1.45644  | 0.383663  | -0.398256 |
| Ti | 0.243412 | 0.449174  | 1.009961  |
| Ti | 2.274624 | -0.991810 | 0.549571  |
| O  | 1.57293  | -0.252266 | 2.105486  |
| Cu | -0.10795 | -2.072845 | 0.387617  |
| O  | 1.68951  | -2.595846 | 0.172173  |
| O  | -1.16317 | -0.571536 | 0.815753  |

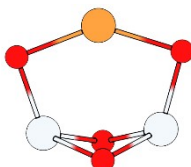

### III structure

Energy: -3639.824434684238 Eh

O 2

|    |           |            |            |
|----|-----------|------------|------------|
| O  | 1.219558  | 0.4410450  | -0.2458650 |
| Ti | 1.321182  | -0.0292400 | 1.4400820  |
| O  | 0.766738  | -1.636601  | 2.13123900 |
| Cu | 0.437448  | -1.198466  | -0.6730430 |
| O  | -0.272310 | -2.9125040 | -0.5334520 |
| Ti | -0.039186 | -3.1449780 | 1.2243030  |
| O  | -0.532030 | -4.570376  | 1.9432450  |

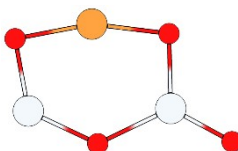

### IV structure

Energy: -3639.696633224879 Eh

O 2

|    |           |            |           |
|----|-----------|------------|-----------|
| O  | 0.912040  | -0.3105600 | -0.287942 |
| Ti | 1.5628390 | 0.248129   | 1.203741  |
| O  | 1.272586  | -0.9678420 | 2.373306  |
| Cu | 0.415944  | -1.866253  | 0.798322  |
| O  | -0.454671 | -2.7648830 | -0.796867 |
| Ti | -0.737083 | -3.9821120 | 0.371285  |
| O  | -0.086874 | -3.437518  | 1.859376  |

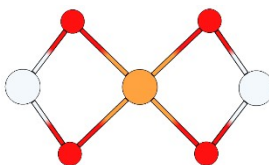

### I-A structure

Energy: -2885.929468406649 Eh

O 2

|    |          |          |          |
|----|----------|----------|----------|
| Ti | -0.74246 | -0.18530 | -1.53635 |
| Cu | -0.17987 | -0.07933 | 0.96809  |
| O  | -0.37885 | -1.50520 | -0.48992 |
| O  | -0.63636 | 1.16945  | -0.49769 |
| C  | 0.22370  | 0.27259  | 2.84379  |
| C  | 0.28649  | -0.96460 | 2.62255  |
| H  | 0.27426  | 1.18362  | 3.42081  |
| C  | 0.48593  | -2.41296 | 2.88463  |
| O  | 0.79044  | -2.79411 | 4.01105  |
| N  | 0.30152  | -3.19763 | 1.79788  |
| H  | 0.05163  | -2.78681 | 0.88928  |
| H  | 0.43200  | -4.19751 | 1.90439  |

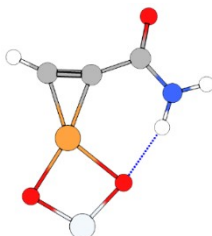

### II-A structure

Energy: -3885.771815656656 Eh

O 2

|    |           |           |          |
|----|-----------|-----------|----------|
| O  | -2.211500 | -0.085360 | -1.99249 |
| Ti | -0.962200 | 1.264010  | -1.78983 |
| Ti | -0.778290 | -1.236460 | -1.98973 |
| O  | 0.290630  | 0.143890  | -2.56335 |
| Cu | -0.21286  | -0.158370 | 0.83401  |
| O  | -0.366070 | -1.742040 | -0.39655 |
| O  | -0.608080 | 1.504280  | -0.14818 |
| C  | 0.206640  | 0.240510  | 2.73528  |
| C  | 0.278870  | -1.009630 | 2.56141  |
| H  | 0.237530  | 1.207610  | 3.23502  |
| C  | 0.501910  | -2.448490 | 2.89479  |
| O  | 0.822120  | -2.775530 | 4.03456  |
| N  | 0.315550  | -3.278140 | 1.83932  |
| H  | 0.049890  | -2.889260 | 0.91192  |
| H  | 0.462200  | -4.276700 | 1.98845  |

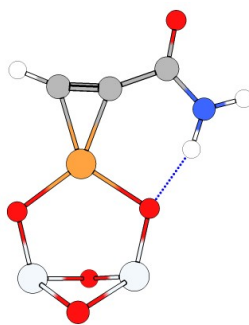

### S-T structure

Energy: -2335.44193262496 Eh

O 2

|    |           |           |           |
|----|-----------|-----------|-----------|
| Ti | 0.410659  | -1.086057 | 0.816404  |
| O  | 0.615307  | 0.567203  | 0.841883  |
| O  | -0.324026 | -1.642751 | 2.207606  |
| O  | 2.298898  | -1.801080 | 1.038479  |
| C  | 3.525988  | -1.589099 | 0.410209  |
| C  | 4.394836  | -2.694387 | 0.241851  |
| C  | 5.648218  | -2.511906 | -0.367458 |
| H  | 6.315461  | -3.376363 | -0.489576 |
| C  | 6.014811  | -1.230741 | -0.811420 |
| H  | 6.994536  | -1.078668 | -1.288188 |
| C  | 5.145807  | -0.148025 | -0.664560 |
| H  | 5.418108  | 0.858924  | -1.011883 |
| C  | 3.878341  | -0.288228 | -0.043637 |
| O  | 3.128433  | 0.810827  | 0.086714  |
| S  | 3.984672  | -4.290633 | 0.928289  |
| S  | 2.035161  | -2.966828 | 3.682034  |
| C  | 1.572801  | -4.719264 | 3.349628  |
| C  | 0.767107  | -5.013680 | 2.067657  |
| H  | 1.008479  | -5.045859 | 4.244916  |
| H  | 2.538543  | -5.262258 | 3.356188  |
| C  | 1.522715  | -5.636806 | 0.880851  |
| H  | 0.220262  | -4.095588 | 1.757859  |
| H  | -0.028843 | -5.734373 | 2.349945  |
| C  | 2.424840  | -4.730956 | 0.040921  |
| H  | 0.765518  | -6.060169 | 0.185636  |
| H  | 2.109444  | -6.513969 | 1.235597  |
| H  | 1.900163  | -3.790454 | -0.220434 |
| H  | 2.703721  | -5.232363 | -0.907714 |
| H  | 2.388912  | -2.349846 | 1.978833  |
| H  | 2.189451  | 0.681523  | 0.459053  |
| H  | 0.783735  | -2.398461 | 3.416966  |

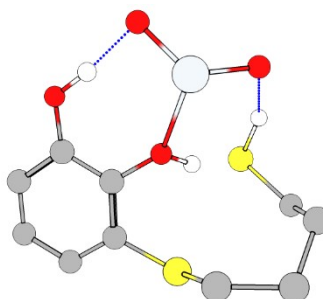

S5. Cartesians coordinates, first frequency for TS and Energies of Z-RC, IN-1, TS-1, IN-2, TS-2, Z-PC, Z-VS (Z-vinyl sulphide derived from propiolamide)

Z-RC structure

Energy: -5221.44098966364 Eh

0 2

|    |           |           |           |
|----|-----------|-----------|-----------|
| Ti | 0.603920  | -1.72603  | 3.549110  |
| O  | 0.89036   | -0.017980 | 3.72053   |
| O  | -0.29793  | -2.06645  | 2.203300  |
| O  | 2.61061   | -2.067570 | 2.80259   |
| C  | 3.129680  | -1.40865  | 1.685110  |
| C  | 3.490530  | -2.20667  | 0.576710  |
| C  | 4.123760  | -1.64317  | -0.543070 |
| H  | 4.40938   | -2.283900 | -1.388460 |
| C  | 4.376150  | -0.26246  | -0.539900 |
| H  | 4.87470   | 0.203210  | -1.403670 |
| C  | 3.986580  | 0.533070  | 0.54373   |
| H  | 4.16841   | 1.618020  | 0.548540  |
| C  | 3.340770  | -0.00099  | 1.689120  |
| O  | 3.01332   | 0.803480  | 2.693480  |
| S  | 3.166280  | -3.96206  | 0.718180  |
| S  | 1.117090  | -4.28319  | 4.617580  |
| C  | 1.203180  | -5.45528  | 3.188840  |
| C  | 0.148840  | -5.23918  | 2.091010  |
| H  | 1.17088   | -6.477180 | 3.615870  |
| H  | 2.23317   | -5.301260 | 2.808060  |
| C  | 0.683120  | -5.31641  | 0.649590  |
| H  | -0.31551  | -4.235050 | 2.20739   |
| H  | -0.66026  | -5.987340 | 2.22690   |
| C  | 1.390570  | -4.04452  | 0.163560  |
| H  | -0.18754  | -5.463640 | -0.02343  |
| H  | 1.32886   | -6.211460 | 0.499480  |
| H  | 0.86880   | -3.143920 | 0.553110  |
| H  | 1.41662   | -4.002180 | -0.943340 |
| H  | 2.73524   | -3.038740 | 2.539340  |
| H  | 2.14307   | 0.476990  | 3.185600  |
| Ti | -2.828000 | 2.50126   | 9.135680  |
| Cu | -2.62540  | 0.06943   | 8.337750  |
| O  | -1.93637  | 1.894660  | 7.80128   |
| O  | -3.51517  | 1.085760  | 9.77808   |
| C  | -2.62897  | -1.850100 | 7.908200  |
| C  | -1.91632  | -1.207220 | 7.077930  |
| C  | -1.02650  | -0.905350 | 5.944810  |
| O  | -0.64330  | -1.88864  | 5.226320  |
| N  | -0.67933  | 0.352420  | 5.74277   |
| H  | -1.03914  | 1.085190  | 6.386620  |
| H  | -0.00542  | 0.484830  | 4.900420  |
| H  | -3.11300  | -2.713780 | 8.36537   |
| H  | -0.22106  | -4.367630 | 4.86087   |

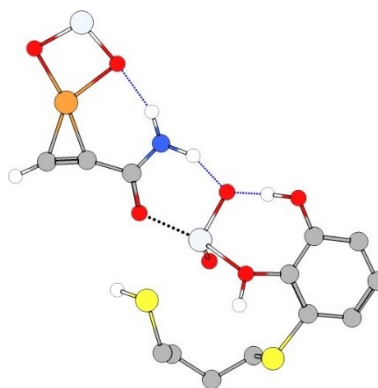

IN-1 structure

Energy: -5221.4484590237 Eh

Energy: -5222.51487709561 Eh B3LYP/6311+G\*/CPCM=DCM

0 2

|    |          |           |           |
|----|----------|-----------|-----------|
| Ti | 0.155034 | -0.991816 | 1.581694  |
| O  | 0.33034  | 0.11073   | 0.380952  |
| O  | -1.27852 | -1.984035 | 1.082922  |
| O  | 2.10860  | -1.72960  | 1.396513  |
| C  | 3.32774  | -1.467585 | 0.767007  |
| C  | 4.30591  | -2.489032 | 0.828527  |
| C  | 5.58817  | -2.297621 | 0.292909  |
| H  | 6.33173  | -3.10328  | 0.367256  |
| C  | 5.88243  | -1.069795 | -0.319838 |

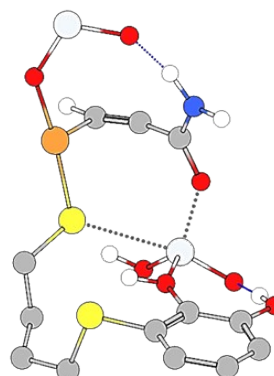



|    |          |            |           |
|----|----------|------------|-----------|
| H  | 6.87963  | -0.89544   | -0.749960 |
| C  | 4.91372  | -0.065583  | -0.393193 |
| H  | 5.12706  | 0.900290   | -0.873438 |
| C  | 3.60853  | -0.222503  | 0.139363  |
| O  | 2.77084  | 0.81021    | 0.039391  |
| S  | 3.841991 | -3.991878  | 1.676266  |
| S  | 0.131269 | -3.470628  | 3.339616  |
| C  | 0.91369  | -5.064978  | 2.860284  |
| C  | 0.78821  | -5.314283  | 1.344571  |
| H  | 0.41878  | -5.86870   | 3.440694  |
| H  | 1.97473  | -5.03598   | 3.177859  |
| C  | 2.03205  | -5.953655  | 0.706751  |
| H  | 0.56892  | -4.35438   | 0.826661  |
| H  | -0.10127 | -5.949200  | 1.155686  |
| C  | 3.09755  | -4.949818  | 0.265809  |
| H  | 1.73724  | -6.50919   | -0.20910  |
| H  | 2.47188  | -6.71578   | 1.387605  |
| H  | 2.66064  | -4.20008   | -0.424820 |
| H  | 3.93597  | -5.45189   | -0.257180 |
| H  | 2.24994  | -2.606000  | 1.90277   |
| H  | 1.79218  | 0.5603538  | 0.17298   |
| Ti | 0.40056  | -2.0160359 | 8.50743   |
| Cu | -0.0381  | -3.2417001 | 5.51082   |
| O  | 0.59930  | -0.552081  | 7.73525   |
| O  | 0.06274  | -3.256360  | 7.36420   |
| C  | -1.70651 | -1.942116  | 5.33440   |
| C  | -1.14633 | -0.891387  | 4.95388   |
| C  | -0.08173 | -0.068513  | 4.48139   |
| O  | 0.09895  | 0.102593   | 3.21022   |
| N  | 0.72134  | 0.496175   | 5.37459   |
| H  | 0.67628  | 0.166823   | 6.42119   |
| H  | 1.49965  | 1.049026   | 5.00446   |
| H  | -2.56876 | -2.523762  | 5.65950   |
| H  | -1.37425 | -2.710046  | 1.74988   |

**TS-1 structure** (-157.79 cm<sup>-1</sup>)

Energy: -5221.43831242394 Eh

Energy: -5222.50075819525 Eh B3LYP/6311+G\*/CPCM=DCM

O 2

|    |           |            |          |
|----|-----------|------------|----------|
| Ti | 0.667640  | -0.7080499 | 1.669903 |
| O  | 0.884663  | 0.450179   | 0.532078 |
| O  | -0.483818 | -1.961630  | 1.00162  |
| O  | 2.626805  | -1.396902  | 1.69113  |
| C  | 3.675251  | -1.3398801 | 0.766383 |
| C  | 4.378214  | -2.5381792 | 0.515816 |
| C  | 5.515073  | -2.5338955 | -0.30787 |
| H  | 6.057668  | -3.472359  | -0.48533 |
| C  | 5.927431  | -1.3211296 | -0.88228 |
| H  | 6.820891  | -1.296133  | -1.52366 |
| C  | 5.201531  | -0.1453328 | -0.66495 |
| H  | 5.500502  | 0.806259   | -1.12747 |
| C  | 4.046471  | -0.1158947 | 0.15263  |
| O  | 3.412210  | 1.049078   | 0.33810  |
| S  | 3.8061707 | -4.016323  | 1.34100  |
| S  | 1.4361845 | -3.372416  | 3.76359  |
| C  | 1.171663  | -5.1495543 | 3.35713  |
| C  | 0.597270  | -5.4496833 | 1.96547  |
| H  | 0.491055  | -5.530303  | 4.14399  |
| H  | 2.149346  | -5.649305  | 3.51587  |
| C  | 1.586515  | -5.6455991 | 0.80756  |
| H  | -0.134299 | -4.662086  | 1.68683  |
| H  | 0.011601  | -6.390015  | 2.05576  |
| C  | 2.325026  | -4.4073224 | 0.29632  |

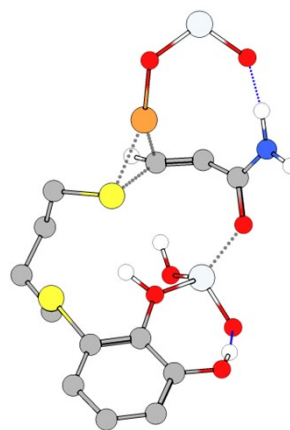

|    |           |            |          |
|----|-----------|------------|----------|
| H  | 1.010616  | -6.045696  | -0.05394 |
| H  | 2.321059  | -6.440245  | 1.06637  |
| H  | 1.646101  | -3.529470  | 0.26935  |
| H  | 2.710292  | -4.576816  | -0.72813 |
| H  | 2.709311  | -2.293170  | 2.17556  |
| H  | 2.416777  | 0.910237   | 0.45462  |
| Ti | -0.353115 | -2.0260704 | 8.69170  |
| Cu | 0.490382  | -3.014053  | 5.82658  |
| O  | -0.806056 | -0.659983  | 7.85887  |
| O  | 0.603020  | -3.036882  | 7.67454  |
| C  | -0.646710 | -2.852445  | 4.15286  |
| C  | -1.016089 | -1.620348  | 4.41179  |
| C  | -0.378566 | -0.356276  | 4.43151  |
| O  | 0.113425  | 0.133602   | 3.30213  |
| N  | -0.295939 | 0.398519   | 5.52413  |
| H  | -0.578971 | 0.022294   | 6.49693  |
| H  | 0.186667  | 1.293492   | 5.42364  |
| H  | -1.213515 | -3.767013  | 3.90755  |
| H  | -0.881522 | -2.501801  | 1.71798  |

### IN-2 structure

Energy: -5221.47070355175 Eh

Energy: -5222.52615406456 Eh B3LYP/6311+G\*/CPCM=DCM

O 2

|    |           |           |            |
|----|-----------|-----------|------------|
| Ti | 0.699420  | -0.640380 | 1.6788300  |
| O  | 0.851040  | 0.50221   | 0.5079000  |
| O  | -0.610240 | -1.83464  | 1.229110   |
| O  | 2.610620  | -1.41547  | 1.519630   |
| C  | 3.658680  | -1.368940 | 0.5973600  |
| C  | 4.390420  | -2.560850 | 0.4017700  |
| C  | 5.524560  | -2.572960 | -0.4246600 |
| H  | 6.087530  | -3.50667  | -0.558630  |
| C  | 5.907460  | -1.379510 | -1.0576200 |
| H  | 6.798030  | -1.36474  | -1.703430  |
| C  | 5.158070  | -0.210730 | -0.8905200 |
| H  | 5.437170  | 0.72498   | -1.3960600 |
| C  | 4.004140  | -0.164320 | -0.0697800 |
| O  | 3.356600  | 0.99769   | 0.0610200  |
| S  | 3.844960  | -4.007200 | 1.2986800  |
| S  | 1.551310  | -3.256410 | 3.8623200  |
| C  | 1.364820  | -5.024610 | 3.4050700  |
| C  | 0.675590  | -5.325150 | 2.0613900  |
| H  | 0.804630  | -5.47453  | 4.249490   |
| H  | 2.389570  | -5.44480  | 3.448510   |
| C  | 1.590010  | -5.633790 | 0.8665500  |
| H  | -0.001890 | -4.48695  | 1.791810   |
| H  | 0.020500  | -6.20940  | 2.211500   |
| C  | 2.370560  | -4.464520 | 0.2684600  |
| H  | 0.953620  | -6.03436  | 0.048570   |
| H  | 2.291190  | -6.45773  | 1.127370   |
| H  | 1.719880  | -3.57239  | 0.161220   |
| H  | 2.764630  | -4.72493  | -0.733280  |
| H  | 2.701570  | -2.29317  | 2.035650   |
| H  | 2.369960  | 0.87152   | 0.2669200  |
| Ti | -0.892260 | -2.433110 | 8.8298700  |
| Cu | -0.77496  | -2.53660  | 6.2475200  |
| O  | -0.809180 | -1.09273  | 7.779870   |
| O  | -0.877940 | -3.77372  | 7.785280   |
| C  | -0.186810 | -2.86366  | 4.249930   |
| C  | -0.647860 | -1.60544  | 4.583850   |
| C  | -0.037260 | -0.33644  | 4.521340   |
| O  | 0.412580  | 0.16990   | 3.3763000  |
| N  | 0.023910  | 0.47505   | 5.5931900  |

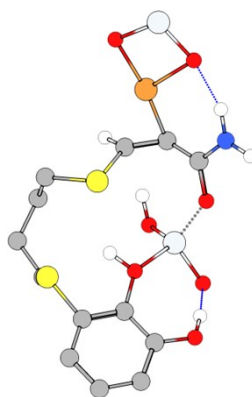

|   |           |          |           |
|---|-----------|----------|-----------|
| H | -0.307100 | 0.111196 | 6.510210  |
| H | 0.379000  | 1.42215  | 5.4721400 |
| H | -0.856530 | -3.70376 | 3.975160  |
| H | -1.001730 | -2.25945 | 2.023990  |

**TS-2 structure** (-1043.82 cm<sup>-1</sup>)

Energy: -5221.45600127691 Eh

O 2

|    |           |           |           |
|----|-----------|-----------|-----------|
| Ti | -0.636109 | 2.636468  | -0.279647 |
| O  | -0.247654 | 3.988427  | -1.162156 |
| O  | -2.284732 | 2.150296  | -0.534137 |
| O  | 0.919492  | 1.313079  | -0.846219 |
| C  | 1.838433  | 1.188662  | -1.899530 |
| C  | 2.471571  | -0.069740 | -2.042350 |
| C  | 3.419929  | -0.300834 | -3.050252 |
| H  | 3.903479  | -1.284439 | -3.121640 |
| C  | 3.725495  | 0.746402  | -3.933006 |
| H  | 4.462333  | 0.592877  | -4.735792 |
| C  | 3.103352  | 1.987466  | -3.794898 |
| H  | 3.336115  | 2.821874  | -4.472607 |
| C  | 2.150001  | 2.268297  | -2.777925 |
| O  | 1.665821  | 3.503286  | -2.738496 |
| S  | 2.0974932 | -1.320421 | -0.823687 |
| S  | -0.044722 | -0.723085 | 1.783353  |
| C  | -0.204577 | -2.557122 | 1.732876  |
| C  | -0.768604 | -3.196283 | 0.460327  |
| H  | -0.854656 | -2.809339 | 2.595704  |
| H  | 0.818180  | -2.926225 | 1.953895  |
| C  | 0.134160  | -3.319840 | -0.774360 |
| H  | -1.719018 | -2.694391 | 0.179695  |
| H  | -1.073818 | -4.224686 | 0.750377  |
| C  | 0.532782  | -2.033216 | -1.509799 |
| H  | -0.409949 | -3.951979 | -1.508392 |
| H  | 1.053455  | -3.893900 | -0.521101 |
| H  | -0.271050 | -1.267728 | -1.464933 |
| H  | 0.744930  | -2.243036 | -2.576049 |
| H  | 1.033111  | 0.456639  | -0.302123 |
| H  | 0.901656  | 3.688835  | -2.068015 |
| Ti | -3.802703 | -1.056820 | 5.297742  |
| Cu | -2.94460  | -0.289861 | 2.999057  |
| O  | -3.475844 | 0.54952   | 4.800706  |
| O  | -3.371208 | -1.99060  | 3.943344  |
| C  | -1.714788 | -0.21984  | 1.427709  |
| C  | -2.224117 | 1.05730   | 1.744193  |
| C  | -1.468521 | 2.12009   | 2.409888  |
| O  | -0.648656 | 2.84414   | 1.712630  |
| N  | -1.702436 | 2.44558   | 3.683561  |
| H  | -2.377884 | 1.88302   | 4.244498  |
| H  | -1.265314 | 3.29006   | 4.056596  |
| H  | -2.187510 | -0.77092  | 0.594019  |
| H  | -2.613313 | 1.61196   | 0.566944  |

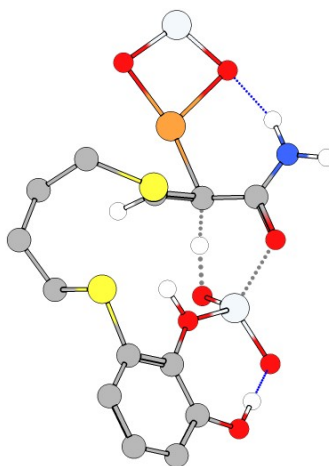

**Z-PC structure**

Energy: -5221.49298035997 Eh

O 2

|    |          |          |          |
|----|----------|----------|----------|
| Ti | 0.907307 | -0.76518 | 1.60261  |
| O  | 1.01253  | 0.35291  | 0.33293  |
| O  | -0.04042 | -2.08151 | 1.20198  |
| O  | 2.92066  | -1.35848 | 1.66848  |
| C  | 3.83765  | -1.36425 | 0.61827  |
| C  | 4.51889  | -2.57332 | 0.37191  |
| C  | 5.54558  | -2.63285 | -0.58448 |
| H  | 6.07569  | -3.57864 | -0.76144 |

|    |          |          |          |
|----|----------|----------|----------|
| C  | 5.85804  | -1.46158 | -1.29410 |
| H  | 6.66491  | -1.47905 | -2.04275 |
| C  | 5.13809  | -0.27797 | -1.08618 |
| H  | 5.35807  | 0.63060  | -1.66594 |
| C  | 4.08351  | -0.18493 | -0.14057 |
| O  | 3.41480  | 0.94846  | 0.02305  |
| S  | 3.978713 | -3.99055 | 1.32798  |
| S  | 1.400023 | -3.12740 | 4.02720  |
| C  | 1.38689  | -4.88061 | 3.47051  |
| C  | 0.72286  | -5.13445 | 2.10241  |
| H  | 0.89801  | -5.44670 | 4.28807  |
| H  | 2.46107  | -5.15416 | 3.48310  |
| C  | 1.66065  | -5.56631 | 0.96377  |
| H  | 0.17971  | -4.21936 | 1.76747  |
| H  | -0.03728 | -5.93100 | 2.24060  |
| C  | 2.48356  | -4.45038 | 0.32101  |
| H  | 1.02628  | -5.98464 | 0.15334  |
| H  | 2.32197  | -6.40291 | 1.28485  |
| H  | 1.85588  | -3.54442 | 0.18985  |
| H  | 2.87552  | -4.76200 | -0.66644 |
| H  | 3.02350  | -2.27756 | 2.08903  |
| H  | 2.37020  | 0.76512  | 0.19138  |
| Ti | -0.98115 | -2.71606 | 8.63916  |
| Cu | -0.84973 | -2.64732 | 6.07088  |
| O  | -1.02295 | -1.31553 | 7.64868  |
| O  | -0.81694 | -3.98441 | 7.51823  |
| C  | -0.34362 | -2.84508 | 4.08892  |
| C  | -0.93638 | -1.60682 | 4.40964  |
| C  | -0.16949 | -0.31438 | 4.46826  |
| O  | 0.44257  | 0.10732  | 3.44657  |
| N  | -0.21892 | 0.38259  | 5.60266  |
| H  | -0.60352 | -0.06951 | 6.46758  |
| H  | 0.26477  | 1.28316  | 5.63872  |
| H  | -0.96061 | -3.62061 | 3.60696  |
| H  | -1.99868 | -1.47869 | 4.12950  |

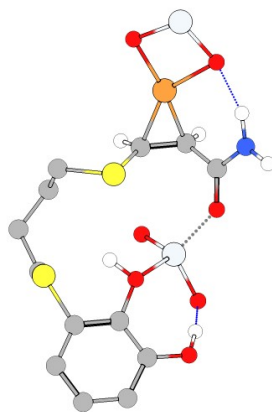

#### Z-VS structure

Energy: -1581.64272400092 Eh

O 1

|   |            |            |            |
|---|------------|------------|------------|
| O | 2.0269741  | -1.3662373 | 0.942205   |
| C | 3.33936711 | -1.371608  | 0.5264736  |
| C | 4.16993396 | -2.511031  | 0.4747638  |
| C | 5.49226145 | -2.376443  | -0.0103468 |
| H | 6.1307931  | -3.2704303 | -0.059352  |
| C | 5.96846877 | -1.129706  | -0.4376675 |
| H | 6.9993280  | -1.0427623 | -0.812426  |
| C | 5.13979184 | 0.0030883  | -0.421070  |
| H | 5.4906582  | 0.9840822  | -0.7714436 |
| C | 3.82454665 | -0.121793  | 0.0528069  |
| O | 2.9768267  | 0.9333904  | 0.088502   |
| S | 3.67715934 | -4.1209948 | 1.057682   |
| S | 1.73209529 | -3.4256719 | 3.523135   |
| C | 1.43901845 | -5.235465  | 3.3529881  |
| C | 0.64732321 | -5.642730  | 2.1041919  |
| H | 0.9308478  | -5.5783247 | 4.277117   |
| H | 2.4534065  | -5.6820397 | 3.351261   |
| C | 1.40995276 | -5.685263  | 0.7699137  |
| H | -0.2388061 | -4.9776932 | 2.009293   |
| H | 0.2419058  | -6.6616520 | 2.288312   |
| C | 2.03276518 | -4.377639  | 0.2661381  |
| H | 0.6948334  | -6.0328998 | -0.005982  |
| H | 2.1973363  | -6.4719697 | 0.817640   |
| H | 1.3992137  | -3.4958533 | 0.489128   |

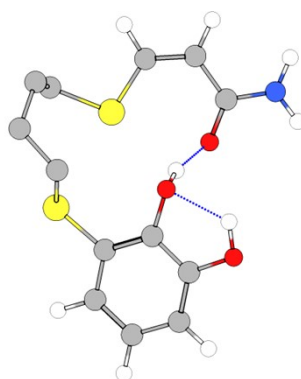

|   |            |            |           |
|---|------------|------------|-----------|
| H | 2.1980144  | -4.4240379 | -0.829045 |
| H | 1.9710364  | -1.2617129 | 1.940429  |
| H | 2.1410318  | 0.5345629  | 0.4353075 |
| C | 0.22439062 | -2.952836  | 4.2449214 |
| C | -0.1737133 | -1.6666856 | 4.485074  |
| C | 0.64202516 | -0.509355  | 4.1008567 |
| O | 1.7139407  | -0.6126259 | 3.463404  |
| N | 0.1763949  | 0.7210379  | 4.4702728 |
| H | -0.6636480 | 0.8412650  | 5.031794  |
| H | 0.7352154  | 1.5384612  | 4.2268202 |
| H | -0.4531252 | -3.7747985 | 4.533746  |
| H | -1.1448552 | -1.5023531 | 4.976843  |

S6. Cartesians coordinates, first frequency for TS and Energies of E-RC, IN-3, TS-3, IN-4, TS-4, E-PC, E-VS (*E*-vinyl sulphide derived from propiolamide)

*E*-RC structure

Energy: -5221.52350020803 Eh

O 2

|    |           |           |           |
|----|-----------|-----------|-----------|
| O  | 0.815858  | 1.31108   | 0.762664  |
| Ti | 0.463826  | 0.566730  | 2.420964  |
| Ti | 1.574090  | -0.354470 | 0.261989  |
| O  | 1.705821  | -0.79610  | 2.122488  |
| Cu | -1.405319 | -1.54288  | 1.14528   |
| O  | 0.394481  | -1.28021  | -0.46073  |
| O  | -1.097600 | -0.11259  | 2.49624   |
| O  | 3.397146  | -1.55428  | -0.30300  |
| C  | 3.505932  | -1.58443  | -1.666383 |
| C  | 3.904296  | -2.74011  | -2.358589 |
| C  | 4.009083  | -2.69266  | -3.763636 |
| H  | 4.340286  | -3.58847  | -4.307459 |
| C  | 3.674551  | -1.51627  | -4.448494 |
| H  | 3.754821  | -1.47979  | -5.544606 |
| C  | 3.217799  | -0.37800  | -3.753931 |
| H  | 2.920887  | 0.53227   | -4.296894 |
| C  | 3.123856  | -0.42323  | -2.361699 |
| O  | 2.637465  | 0.58476   | -1.546169 |
| S  | 4.167032  | -4.202838 | -1.363807 |
| S  | -0.330903 | -3.08243  | 2.553446  |
| C  | 0.356510  | -4.52655  | 1.636166  |
| C  | 1.288803  | -4.16325  | 0.484893  |
| H  | -0.529460 | -5.08284  | 1.266186  |
| H  | 0.864155  | -5.17789  | 2.378975  |
| C  | 1.790695  | -5.38628  | -0.287378 |
| H  | 2.152684  | -3.60452  | 0.906334  |
| H  | 0.772228  | -3.44871  | -0.191443 |
| C  | 2.525468  | -5.06775  | -1.589301 |
| H  | 0.920134  | -6.01937  | -0.574278 |
| H  | 2.423908  | -6.03033  | 0.362460  |
| H  | 1.919804  | -4.40354  | -2.237203 |
| H  | 2.748962  | -5.99389  | -2.155045 |
| H  | 0.789165  | -2.21136  | 2.455473  |
| H  | 3.589532  | -2.48896  | 0.006171  |
| H  | 2.143423  | 1.26387   | -2.045958 |
| C  | -2.89063  | 0.534315  | -0.694403 |
| C  | -2.75127  | -2.122397 | -0.221201 |
| C  | -2.64765  | -0.863952 | -0.255677 |
| N  | -1.86605  | 1.399721  | -0.477240 |
| O  | -3.95488  | 0.829232  | -1.238369 |
| H  | -0.97361  | 1.167782  | -0.005299 |
| H  | -3.11811  | -3.108828 | -0.498489 |
| H  | -2.02306  | 2.365149  | -0.768442 |

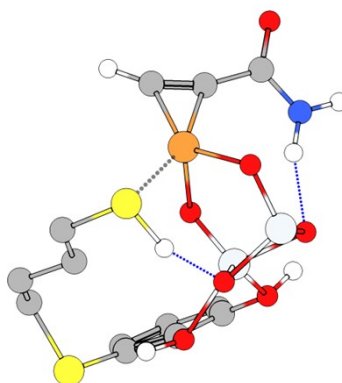

### IN-3 structure

Energy: -5221.53628957496 Eh

Energy: -5222.60407945043 Eh B3LYP/6311+G\*/CPCM=DCM

O 2

|    |           |            |            |
|----|-----------|------------|------------|
| O  | 0.098693  | 3.484838   | 1.430188   |
| Ti | -0.589881 | 2.7301443  | 2.9520232  |
| Ti | 0.601105  | 1.7990743  | 0.7945938  |
| O  | 0.575363  | 1.185097   | 2.710156   |
| Cu | -2.57217  | 0.3508954  | 2.358282   |
| O  | -0.596834 | 1.144009   | -0.142798  |
| O  | -2.196952 | 2.223500   | 2.909631   |
| O  | 2.241325  | 0.364376   | 0.316253   |
| C  | 2.512916  | 0.4262243  | -1.0235150 |
| C  | 2.789427  | -0.7253811 | -1.778381  |
| C  | 3.083221  | -0.5854623 | -3.148582  |
| H  | 3.316933  | -1.480605  | -3.741557  |
| C  | 3.052417  | 0.6851173  | -3.7418337 |
| H  | 3.282662  | 0.795173   | -4.811100  |
| C  | 2.703975  | 1.8280905  | -2.9942601 |
| H  | 2.638522  | 2.816536   | -3.474641  |
| C  | 2.419707  | 1.6871737  | -1.6351017 |
| O  | 1.992886  | 2.691970   | -0.777610  |
| S  | 2.656942  | -2.2757854 | -0.8981649 |
| S  | -1.220144 | -1.0239317 | 3.568484   |
| C  | -0.898309 | -2.398159  | 2.382385   |
| C  | -0.054601 | -1.986184  | 1.178264   |
| H  | -1.874908 | -2.802647  | 2.043084   |
| H  | -0.396348 | -3.210553  | 2.950051   |
| C  | 0.137895  | -3.0910980 | 0.1344846  |
| H  | 0.936161  | -1.652368  | 1.562576   |
| H  | -0.523956 | -1.101841  | 0.694938   |
| C  | 0.837264  | -2.6333246 | -1.145816  |
| H  | -0.861362 | -3.469532  | -0.177112  |
| H  | 0.665492  | -3.967055  | 0.572504   |
| H  | 0.384515  | -1.694834  | -1.524701  |
| H  | 0.776822  | -3.400871  | -1.942692  |
| H  | 0.092007  | 0.290801   | 3.014055   |
| H  | 2.249005  | -0.614897  | 0.552328   |
| H  | 1.724972  | 3.503134   | -1.251989  |
| C  | -4.217059 | 1.853909   | 0.1975190  |
| C  | -3.833010 | -0.648348  | 1.205422   |
| C  | -3.897346 | 0.562300   | 0.8519662  |
| N  | -3.142479 | 2.410415   | -0.419167  |
| O  | -5.353045 | 2.324186   | 0.233288   |
| H  | -2.197999 | 1.983594   | -0.350568  |
| H  | -4.074053 | -1.711130  | 1.200942   |
| H  | -3.269769 | 3.333450   | -0.833832  |

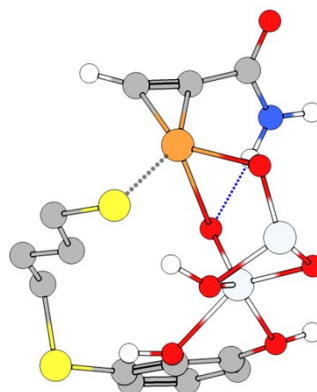

### TS-3 structure (-228.13 cm<sup>-1</sup>)

Energy: -5221.48900988505 Eh

Energy: -5222.55760493778 Eh B3LYP/6311+G\*/CPCM=DCM

O 2

|    |           |           |            |
|----|-----------|-----------|------------|
| O  | 0.601370  | 3.480991  | 1.8115494  |
| Ti | -0.029663 | 2.730401  | 3.3472545  |
| Ti | 0.698880  | 1.8371549 | 0.9118846  |
| O  | 0.576618  | 0.980779  | 2.7452029  |
| Cu | -2.501498 | 1.561981  | 2.622219   |
| O  | -0.530376 | 1.532234  | -0.139939  |
| O  | -1.689992 | 2.824238  | 3.7439856  |
| O  | 2.179190  | 0.303652  | 0.3223448  |
| C  | 2.492848  | 0.433847  | -1.0048090 |
| C  | 2.701297  | -0.684744 | -1.8261440 |
| C  | 3.035629  | -0.479274 | -3.1787876 |

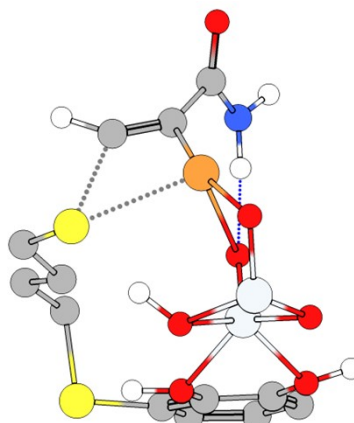

|   |            |           |             |
|---|------------|-----------|-------------|
| H | 3.215732   | -1.348452 | -3.8266721  |
| C | 3.1150309  | 0.826782  | -3.68468818 |
| H | 3.3750950  | 0.988267  | -4.740490   |
| C | 2.8471065  | 1.943299  | -2.86694221 |
| H | 2.8790992  | 2.963272  | -3.279500   |
| C | 2.5232317  | 1.737226  | -1.52475350 |
| O | 2.1840278  | 2.710371  | -0.597974   |
| S | 2.4573672  | -2.271441 | -1.04021851 |
| S | -1.5545560 | -1.022432 | 3.4151517   |
| C | -1.0989854 | -2.360870 | 2.247022    |
| C | -0.2542614 | -1.905355 | 1.056132    |
| H | -2.0493811 | -2.813564 | 1.880463    |
| H | -0.5825076 | -3.155240 | 2.826107    |
| C | -0.1047695 | -2.969612 | -0.036176   |
| H | 0.7462321  | -1.613464 | 1.446715    |
| H | -0.7104404 | -0.991223 | 0.618703    |
| C | 0.6181731  | -2.493418 | -1.2961830  |
| H | -1.1191833 | -3.290903 | -0.361214   |
| H | 0.3832339  | -3.884903 | 0.365190    |
| H | 0.2255456  | -1.512165 | -1.631458   |
| H | 0.5054395  | -3.216455 | -2.127881   |
| H | -0.1094969 | 0.208802  | 2.952898    |
| H | 2.1309255  | -0.688837 | 0.496418    |
| H | 1.9543712  | 3.564148  | -1.014293   |
| C | -4.1412962 | 1.198070  | 0.031898    |
| C | -3.2911721 | -0.457678 | 1.879509    |
| C | -3.4238370 | 0.639666  | 1.219382    |
| N | -3.2758010 | 1.463728  | -0.991533   |
| O | -5.3551352 | 1.382637  | -0.003898   |
| H | -2.2580463 | 1.506608  | -0.800765   |
| H | -3.6678360 | -1.479404 | 2.001002    |
| H | -3.6674631 | 1.921800  | -1.815334   |

#### IN-4 structure

Energy: -5221.54266490499 Eh

Energy: -5222.60687790952 Eh B3LYP/6311+G\*/CPCM=DCM

O 2

|    |           |            |           |
|----|-----------|------------|-----------|
| O  | 1.672855  | 1.544337   | 0.7665239 |
| Ti | 0.696002  | 0.8687767  | 2.133884  |
| Ti | 1.831913  | -0.1301962 | -0.080744 |
| O  | 1.442967  | -0.930010  | 1.778242  |
| Cu | -1.44182  | -0.3606194 | 1.126138  |
| O  | 0.736689  | -0.379565  | -1.280949 |
| O  | -0.98436  | 1.1848400  | 2.096528  |
| O  | 3.378367  | -1.655382  | -0.590420 |
| C  | 3.704333  | -1.4700905 | -1.913882 |
| C  | 3.846220  | -2.5530338 | -2.794534 |
| C  | 4.200070  | -2.2947696 | -4.132744 |
| H  | 4.326406  | -3.136491  | -4.827958 |
| C  | 4.355846  | -0.9696281 | -4.566802 |
| H  | 4.630129  | -0.767305  | -5.611942 |
| C  | 4.131453  | 0.1146568  | -3.695125 |
| H  | 4.205607  | 1.1519825  | -4.055252 |
| C  | 3.787653  | -0.1453776 | -2.367060 |
| O  | 3.467271  | 0.790304   | -1.396595 |
| S  | 3.492893  | -4.1603708 | -2.102197 |
| S  | -0.471651 | -3.4571398 | 2.259188  |
| C  | 0.719262  | -4.7658191 | 1.743574  |
| C  | 1.603689  | -4.3922250 | 0.542857  |
| H  | 0.157006  | -5.7055436 | 1.558769  |
| H  | 1.329658  | -4.9313289 | 2.653651  |
| C  | 1.058888  | -4.8266045 | -0.827185 |
| H  | 2.616516  | -4.824478  | 0.6888762 |

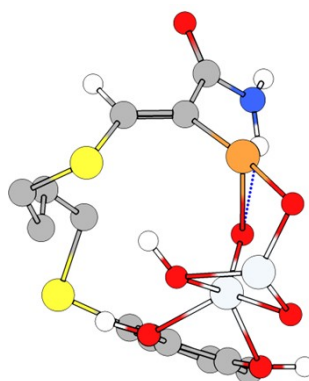

|   |           |            |            |
|---|-----------|------------|------------|
| H | 1.726690  | -3.287578  | 0.5537572  |
| C | 1.625934  | -4.0482174 | -2.011764  |
| H | -0.03777  | -4.6578226 | -0.862636  |
| H | 1.211813  | -5.919277  | -0.963638  |
| H | 1.354105  | -2.973604  | -1.931849  |
| H | 1.230069  | -4.430713  | -2.972628  |
| H | 0.839746  | -1.728987  | 1.912617   |
| H | 3.369223  | -2.651681  | -0.450331  |
| H | 3.243096  | 1.663659   | -1.7739541 |
| C | -2.500185 | -2.071931  | -1.035339  |
| C | -1.427649 | -3.243937  | 0.7713392  |
| C | -1.764930 | -2.025294  | 0.2847964  |
| N | -2.07282  | -1.0880871 | -1.897042  |
| O | -3.36299  | -2.9016475 | -1.335113  |
| H | -1.156927 | -0.645203  | -1.719986  |
| H | -1.775577 | -4.185176  | 0.299589   |
| H | -2.392129 | -1.171931  | -2.864004  |

**TS-4 structure** (-665.60 cm<sup>-1</sup>)

Energy: -5221.50302734984 Eh

O 2

|    |            |            |            |
|----|------------|------------|------------|
| O  | 2.214358   | 0.3851220  | 2.262450   |
| Ti | 0.7399724  | -0.820798  | 2.3551437  |
| Ti | 2.2927411  | 0.231063   | 0.4723882  |
| O  | 1.524958   | -1.515640  | 0.6312082  |
| Cu | -0.625660  | 0.038906   | 0.209065   |
| O  | 1.026457   | 1.0575560  | -0.441754  |
| O  | -0.716553  | 0.020146   | 2.2044007  |
| O  | 3.858974   | -1.016387  | -0.4904549 |
| C  | 3.5703061  | -1.060764  | -1.840369  |
| C  | 3.4635704  | -2.291863  | -2.513795  |
| C  | 3.1541950  | -2.290360  | -3.886729  |
| H  | 3.085449   | -3.2470517 | -4.424393  |
| C  | 2.9070450  | -1.074187  | -4.542939  |
| H  | 2.664907   | -1.0754406 | -5.615966  |
| C  | 2.9328893  | 0.143317   | -3.839127  |
| H  | 2.691082   | 1.0958110  | -4.332818  |
| C  | 3.2429768  | 0.158138   | -2.469866  |
| O  | 3.156571   | 1.2755188  | -1.676861  |
| S  | 3.5399313  | -3.772817  | -1.506411  |
| S  | -0.7482533 | -3.058807  | 1.974875   |
| C  | 0.2284161  | -4.632674  | 1.973527   |
| C  | 1.5024957  | -4.680115  | 1.113952   |
| H  | -0.479530  | -5.445240  | 1.7050774  |
| H  | 0.467931   | -4.7604941 | 3.049455   |
| C  | 1.3015179  | -5.104906  | -0.363102  |
| H  | 2.188944   | -5.3994524 | 1.608492   |
| H  | 2.006294   | -3.6926727 | 1.156092   |
| C  | 1.7076935  | -4.091277  | -1.429347  |
| H  | 0.227300   | -5.3128385 | -0.556920  |
| H  | 1.819854   | -6.0683721 | -0.554996  |
| H  | 1.235436   | -3.1134828 | -1.238408  |
| H  | 1.397108   | -4.4397995 | -2.433246  |
| H  | 0.546082   | -1.5911178 | -0.015113  |
| H  | 3.778739   | -1.9788731 | -0.196202  |
| H  | 2.145432   | 1.4245078  | -1.450265  |
| C  | -1.057289  | -2.0254305 | -2.018805  |
| C  | -1.175996  | -2.9230941 | 0.239135   |
| C  | -0.814147  | -1.8633978 | -0.534390  |
| N  | -0.517750  | -0.990304  | -2.741290  |
| O  | -1.602544  | -2.998444  | -2.545474  |
| H  | -0.023300  | -0.233138  | -2.2595003 |
| H  | -1.717552  | -3.800607  | -0.1674404 |

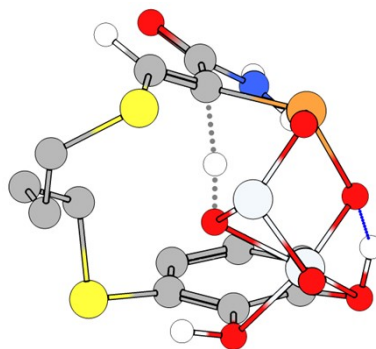



H -0.537506 -1.028742 -3.7606244

### E-PC structure

Energy: -5221.5659995892 Eh

O 2

|    |           |            |           |
|----|-----------|------------|-----------|
| O  | 3.235924  | 0.71848    | 2.316822  |
| Ti | 2.851477  | -0.61769   | 3.559089  |
| Ti | 3.027332  | -0.58698   | 1.025688  |
| O  | 3.419762  | -1.88520   | 2.328150  |
| Cu | 0.613578  | -1.16836   | 2.155227  |
| O  | 1.407222  | -0.67797   | 0.395200  |
| O  | 1.192492  | -0.81242   | 3.987537  |
| O  | 3.999815  | -1.95398   | -0.475423 |
| C  | 3.568756  | -1.59270   | -1.720241 |
| C  | 3.165934  | -2.53899   | -2.677155 |
| C  | 2.707217  | -2.08964   | -3.932444 |
| H  | 2.405702  | -2.82780   | -4.688892 |
| C  | 2.621341  | -0.71501   | -4.192623 |
| H  | 2.265781  | -0.36365   | -5.172021 |
| C  | 2.981605  | 0.23211    | -3.210971 |
| H  | 2.891038  | 1.31131    | -3.410096 |
| C  | 3.445324  | -0.21250   | -1.970396 |
| O  | 3.768550  | 0.59517    | -0.892767 |
| S  | 3.186122  | -4.24834   | -2.154701 |
| S  | -0.881029 | -2.960449  | 1.972295  |
| C  | 0.506789  | -4.2139027 | 1.945128  |
| C  | 1.424010  | -4.1140917 | 0.723168  |
| H  | 0.060201  | -5.222937  | 2.064045  |
| H  | 1.046018  | -3.956913  | 2.878326  |
| C  | 1.019134  | -5.0276780 | -0.444685 |
| H  | 2.456560  | -4.342947  | 1.059025  |
| H  | 1.448467  | -3.050921  | 0.396210  |
| C  | 1.365357  | -4.5067812 | -1.836863 |
| H  | -0.085405 | -5.155466  | -0.454979 |
| H  | 1.432382  | -6.049617  | -0.299643 |
| H  | 0.895439  | -3.520256  | -2.015757 |
| H  | 1.007328  | -5.202956  | -2.620570 |
| H  | 3.870155  | -2.945104  | -0.402873 |
| H  | 3.374152  | 1.484097   | -0.990470 |
| C  | -1.467664 | -2.228443  | -2.058560 |
| C  | -1.461699 | -3.038333  | 0.285656  |
| C  | -1.048563 | -2.135108  | -0.624539 |
| N  | -0.723482 | -1.405537  | -2.871829 |
| O  | -2.341741 | -2.983451  | -2.481524 |
| H  | 0.047215  | -0.844384  | -2.506141 |
| H  | -2.174114 | -3.838163  | 0.015298  |
| H  | -0.876088 | -1.442178  | -3.879707 |
| H  | -0.299118 | -1.373178  | -0.326133 |

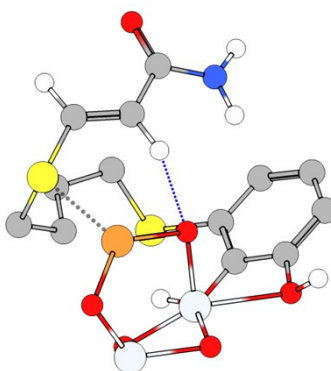

### E-VS structure

Energy: -1581.64556658438 Eh

O 1

|   |           |           |           |
|---|-----------|-----------|-----------|
| O | 2.523350  | -0.893895 | -0.341251 |
| C | 2.7700592 | -1.088620 | -1.64918  |
| C | 3.2901330 | -2.304406 | -2.15819  |
| C | 3.5858515 | -2.450269 | -3.52714  |
| H | 4.010479  | -3.399902 | -3.883274 |
| C | 3.3331993 | -1.394121 | -4.40957  |
| H | 3.566385  | -1.494252 | -5.479340 |
| C | 2.7662652 | -0.201244 | -3.92509  |
| H | 2.533854  | 0.625095  | -4.617566 |
| C | 2.4747928 | -0.043604 | -2.56421  |
| O | 1.867808  | 1.078050  | -2.049368 |

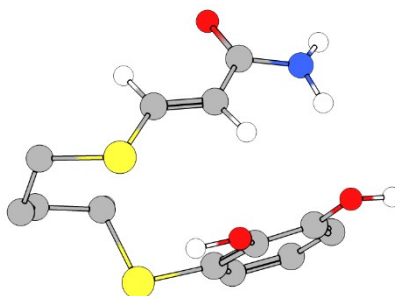

|   |           |           |           |
|---|-----------|-----------|-----------|
| S | 3.5153570 | -3.637961 | -0.988867 |
| S | 0.5072954 | -2.838768 | 1.548979  |
| C | 0.4837911 | -4.669975 | 1.721821  |
| C | 1.7066945 | -5.419776 | 1.178485  |
| H | -0.462513 | -5.036292 | 1.270778  |
| H | 0.403380  | -4.834529 | 2.814804  |
| C | 1.7430156 | -5.710448 | -0.32904  |
| H | 1.739047  | -6.398246 | 1.704709  |
| H | 2.629589  | -4.882622 | 1.487236  |
| C | 1.9182775 | -4.528948 | -1.28146  |
| H | 0.802433  | -6.229220 | -0.622371 |
| H | 2.559218  | -6.440798 | -0.519277 |
| H | 1.101956  | -3.786331 | -1.194040 |
| H | 1.936183  | -4.887163 | -2.330244 |
| H | 0.181462  | -0.568988 | -0.270980 |
| H | 2.681821  | -1.770782 | 0.103286  |
| H | 1.903495  | 1.779082  | -2.727012 |
| C | -1.296868 | -1.282923 | -1.800686 |
| C | -0.463839 | -2.568915 | 0.121172  |
| C | -0.476388 | -1.400974 | -0.563515 |
| N | -1.057000 | -0.122276 | -2.501788 |
| O | -2.099114 | -2.140505 | -2.177371 |
| H | -0.237397 | 0.452889  | -2.285595 |
| H | -1.117392 | -3.391008 | -0.226530 |
| H | -1.471224 | -0.055380 | -3.431601 |

S7. Cartesians coordinates, first frequency for TS and Energies of Z-RC', IN-1', TS-1', IN-2', TS-2', Z-PC', Z-VS' (Z-vinyl sulphide derived from dimethyl acetylenedicarboxylate)

Z-RC' structure

Energy: -5508.315269684155 Eh

0 2

|    |          |          |          |
|----|----------|----------|----------|
| Ti | 0.45202  | -1.14172 | 3.64865  |
| O  | 1.43694  | 0.17899  | 4.10863  |
| O  | -0.01386 | -1.08313 | 2.05430  |
| O  | 2.20078  | -2.38433 | 3.30454  |
| C  | 3.09972  | -2.04587 | 2.28465  |
| C  | 3.26937  | -2.97970 | 1.23780  |
| C  | 4.21905  | -2.77752 | 0.22208  |
| H  | 4.32552  | -3.53398 | -0.56680 |
| C  | 4.99437  | -1.60810 | 0.25967  |
| H  | 5.75017  | -1.43363 | -0.52035 |
| C  | 4.80704  | -0.66517 | 1.27753  |
| H  | 5.41253  | 0.25245  | 1.31340  |
| C  | 3.85554  | -0.83554 | 2.31995  |
| O  | 3.76580  | 0.09713  | 3.26032  |
| S  | 2.27341  | -4.46522 | 1.31687  |
| S  | -0.29327 | -3.51561 | 4.94773  |
| C  | -0.40656 | -4.71106 | 3.53489  |
| C  | -1.09006 | -4.14589 | 2.28159  |
| H  | -0.90412 | -5.62425 | 3.91548  |
| H  | 0.65290  | -4.96939 | 3.33272  |
| C  | -0.52141 | -4.69191 | 0.95990  |
| H  | -0.96066 | -3.04022 | 2.24073  |
| H  | -2.18378 | -4.32423 | 2.35353  |
| C  | 0.70579  | -3.90782 | 0.47036  |
| H  | -1.30172 | -4.60100 | 0.17363  |
| H  | -0.30603 | -5.78259 | 1.02497  |
| H  | 0.58558  | -2.82360 | 0.68613  |
| H  | 0.87038  | -4.04462 | -0.61636 |
| H  | 1.95181  | -3.33447 | 3.05501  |
| H  | 2.79307  | 0.16138  | 3.66684  |
| Ti | -4.12042 | 1.71057  | 10.34403 |

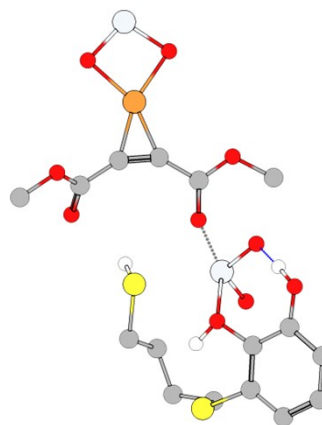

|    |          |          |          |
|----|----------|----------|----------|
| Cu | -3.07062 | 0.30126  | 8.47174  |
| O  | -3.46679 | 2.20193  | 8.84738  |
| O  | -3.88769 | 0.02570  | 10.24941 |
| H  | -1.62440 | -3.22677 | 5.03368  |
| C  | -2.57834 | -2.73534 | 7.71069  |
| O  | -2.01371 | -3.10891 | 8.86618  |
| C  | -1.92881 | -4.53070 | 9.09345  |
| H  | -1.20469 | -4.65419 | 9.91616  |
| H  | -1.58090 | -5.04853 | 8.17892  |
| H  | -2.92050 | -4.93022 | 9.38762  |
| C  | -2.51688 | -1.27914 | 7.52551  |
| C  | -2.24368 | -0.24272 | 6.82051  |
| C  | -1.64238 | 0.25236  | 5.58638  |
| O  | -1.29425 | -0.55766 | 4.70911  |
| O  | -1.52491 | 1.55702  | 5.51342  |
| C  | -0.90569 | 2.11447  | 4.31553  |
| H  | 0.12312  | 1.69816  | 4.20138  |
| H  | -1.51063 | 1.83407  | 3.43133  |
| H  | -0.91634 | 3.20403  | 4.47403  |
| O  | -3.06346 | -3.48447 | 6.87732  |

### IN-1' structure

Energy: -5508.311494150436 Eh

O 2

|    |           |           |           |
|----|-----------|-----------|-----------|
| Ti | 0.103280  | -1.463860 | 1.354490  |
| O  | 0.201130  | -0.550520 | -0.007620 |
| O  | -1.136900 | -2.750090 | 0.953190  |
| O  | 2.169830  | -1.655880 | 1.526340  |
| C  | 3.329780  | -1.268370 | 0.863000  |
| C  | 4.415490  | -2.170210 | 0.895690  |
| C  | 5.659120  | -1.804100 | 0.350030  |
| H  | 6.487720  | -2.525900 | 0.359510  |
| C  | 5.786470  | -0.534020 | -0.242190 |
| H  | 6.750320  | -0.231010 | -0.686240 |
| C  | 4.690520  | 0.336340  | -0.319800 |
| H  | 4.777920  | 1.316790  | -0.814910 |
| C  | 3.420730  | -0.011220 | 0.209550  |
| O  | 2.406360  | 0.857470  | 0.102490  |
| S  | 4.090170  | -3.776280 | 1.627910  |
| S  | 0.807660  | -3.523310 | 3.315820  |
| C  | 1.186230  | -5.293340 | 2.925560  |
| C  | 1.024570  | -5.652000 | 1.436760  |
| H  | 0.502120  | -5.896160 | 3.553790  |
| H  | 2.219120  | -5.492260 | 3.279610  |
| C  | 2.321010  | -5.757270 | 0.614530  |
| H  | 0.337860  | -4.920940 | 0.956270  |
| H  | 0.507260  | -6.633510 | 1.367450  |
| C  | 3.010120  | -4.439250 | 0.254100  |
| H  | 2.073550  | -6.254360 | -0.349420 |
| H  | 3.043090  | -6.440170 | 1.117320  |
| H  | 2.258260  | -3.660280 | 0.016020  |
| H  | 3.684380  | -4.551890 | -0.617710 |
| H  | 2.389790  | -2.466750 | 2.120040  |
| H  | 1.508170  | 0.380900  | 0.084810  |
| Ti | -0.378600 | -2.784290 | 8.362980  |
| Cu | 0.385270  | -3.261280 | 5.465380  |
| O  | 0.085680  | -1.232170 | 8.669600  |
| O  | 0.708590  | -3.612360 | 7.300820  |
| C  | -1.416940 | -2.171310 | 5.493800  |
| C  | -0.984650 | -1.144420 | 4.850900  |
| C  | -0.140000 | -0.369020 | 4.073670  |
| O  | -0.295070 | -0.215060 | 2.795290  |
| O  | 0.874490  | 0.322960  | 4.619360  |

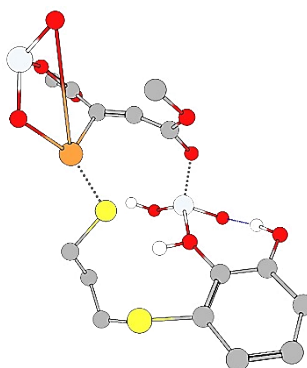

|   |           |           |          |
|---|-----------|-----------|----------|
| H | -1.262050 | -3.306590 | 1.756080 |
| C | -2.458350 | -2.638860 | 6.348550 |
| O | -2.245350 | -2.893910 | 7.589020 |
| O | -3.635960 | -2.897730 | 5.781410 |
| C | -4.696230 | -3.488060 | 6.560980 |
| H | -5.117130 | -4.408340 | 5.894410 |
| H | -5.555980 | -2.640270 | 6.726740 |
| H | -4.232150 | -3.847580 | 7.613170 |
| C | 1.232430  | 0.008070  | 5.981090 |
| H | 1.991330  | 0.759740  | 6.274510 |
| H | 1.674310  | -1.017510 | 6.026540 |
| H | 0.356710  | 0.036810  | 6.669220 |

TS-1' structure (-125.13. cm<sup>-1</sup>)

Energy: -5508.268539107341Eh

O 2

|    |           |           |           |
|----|-----------|-----------|-----------|
| Ti | 0.392740  | -0.933180 | 1.725590  |
| O  | 0.477940  | 0.089320  | 0.443310  |
| O  | -0.872540 | -2.145170 | 1.247390  |
| O  | 2.390160  | -1.431740 | 1.536900  |
| C  | 3.458860  | -1.351630 | 0.641720  |
| C  | 4.399520  | -2.406350 | 0.718940  |
| C  | 5.561900  | -2.393540 | -0.066000 |
| H  | 6.291120  | -3.211790 | 0.005960  |
| C  | 5.760250  | -1.313020 | -0.944400 |
| H  | 6.654950  | -1.279250 | -1.583690 |
| C  | 4.815310  | -0.286050 | -1.040230 |
| H  | 4.941700  | 0.554830  | -1.737170 |
| C  | 3.630330  | -0.267660 | -0.258600 |
| O  | 2.792990  | 0.761540  | -0.405940 |
| S  | 4.002620  | -3.727910 | 1.866270  |
| S  | 1.049440  | -2.900390 | 3.789540  |
| C  | 1.004410  | -4.731460 | 3.636680  |
| C  | 0.821330  | -5.299620 | 2.221300  |
| H  | 0.187080  | -5.044790 | 4.314140  |
| H  | 1.942970  | -5.087870 | 4.111530  |
| C  | 2.081670  | -5.779100 | 1.476640  |
| H  | 0.275280  | -4.566840 | 1.592270  |
| H  | 0.140100  | -6.173660 | 2.307070  |
| C  | 2.901410  | -4.719080 | 0.740490  |
| H  | 1.754330  | -6.500550 | 0.696800  |
| H  | 2.741190  | -6.358220 | 2.159670  |
| H  | 2.247580  | -4.006430 | 0.198650  |
| H  | 3.584460  | -5.187710 | 0.004900  |
| H  | 2.640580  | -2.209440 | 2.162560  |
| H  | 1.865660  | 0.586760  | -0.013910 |
| Ti | 0.280360  | -3.988530 | 8.080470  |
| Cu | 0.027650  | -2.574200 | 5.921540  |
| O  | 0.875290  | -2.430410 | 7.684850  |
| O  | -0.386440 | -4.541260 | 6.625980  |
| C  | -1.191990 | -2.226720 | 4.468360  |
| C  | -1.140520 | -0.955490 | 4.800790  |
| C  | -0.225290 | 0.071010  | 4.504990  |
| O  | 0.200700  | 0.258560  | 3.303300  |
| O  | 0.217180  | 0.930040  | 5.415640  |
| C  | -2.273600 | -3.206880 | 4.213050  |
| H  | -1.141300 | -2.851780 | 1.879790  |
| C  | -0.161960 | 0.693490  | 6.787580  |
| H  | 0.212950  | 1.564780  | 7.357740  |
| H  | 0.303650  | -0.247100 | 7.158880  |
| H  | -1.268140 | 0.611970  | 6.868240  |
| O  | -3.320130 | -3.239370 | 4.824310  |
| O  | -1.961480 | -4.049290 | 3.187650  |

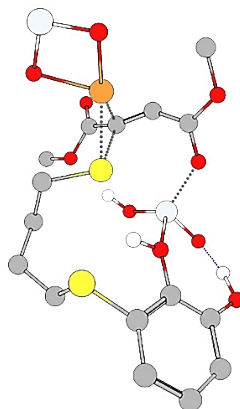

|   |           |           |          |
|---|-----------|-----------|----------|
| C | -2.943900 | -5.075670 | 2.929910 |
| H | -2.516720 | -5.698390 | 2.087910 |
| H | -3.924810 | -4.604900 | 2.635850 |
| H | -3.097360 | -5.696100 | 3.869690 |

### IN-2' structure

Energy: -5508.311829730415 Eh

O 2

|    |           |           |           |
|----|-----------|-----------|-----------|
| Ti | 0.728069  | -0.792241 | 1.967692  |
| O  | 0.586339  | 0.344075  | 0.797387  |
| O  | -0.592072 | -2.017510 | 1.715651  |
| O  | 2.629746  | -1.430897 | 1.423410  |
| C  | 3.501846  | -1.265457 | 0.339937  |
| C  | 4.323550  | -2.372600 | 0.024798  |
| C  | 5.299145  | -2.284583 | -0.978527 |
| H  | 5.935700  | -3.153002 | -1.197193 |
| C  | 5.434153  | -1.071896 | -1.673237 |
| H  | 6.191898  | -0.975061 | -2.465072 |
| C  | 4.606122  | 0.014499  | -1.376418 |
| H  | 4.694990  | 0.966173  | -1.920312 |
| C  | 3.610237  | -0.040197 | -0.369294 |
| O  | 2.887064  | 1.057626  | -0.134181 |
| S  | 4.094364  | -3.834044 | 1.028228  |
| S  | 1.761864  | -3.180023 | 4.245832  |
| C  | 1.943051  | -4.810362 | 3.421723  |
| C  | 1.119073  | -5.032709 | 2.140406  |
| H  | 1.744550  | -5.591033 | 4.177988  |
| H  | 3.032855  | -4.814274 | 3.216767  |
| C  | 1.910407  | -5.641891 | 0.972143  |
| H  | 0.660078  | -4.078121 | 1.806758  |
| H  | 0.265319  | -5.692931 | 2.390631  |
| C  | 2.685766  | -4.638752 | 0.118223  |
| H  | 1.202241  | -6.146050 | 0.280183  |
| H  | 2.590916  | -6.444632 | 1.334276  |
| H  | 2.020758  | -3.824176 | -0.233170 |
| H  | 3.127437  | -5.127671 | -0.772529 |
| H  | 2.920142  | -2.325733 | 1.834660  |
| H  | 1.976950  | 0.846744  | 0.260852  |
| Ti | -4.211991 | -0.541920 | 6.967298  |
| Cu | -2.170435 | -1.395266 | 5.576071  |
| O  | -4.029773 | -0.723405 | 5.289947  |
| O  | -2.722996 | -1.062883 | 7.587083  |
| C  | 0.032375  | -2.965167 | 4.708128  |
| C  | -0.412212 | -1.694503 | 4.994238  |
| C  | 0.310673  | -0.470682 | 4.845944  |
| O  | 0.577356  | 0.064966  | 3.696750  |
| H  | -0.869915 | -2.469664 | 2.543553  |
| O  | 0.704661  | 0.258685  | 5.878860  |
| C  | 0.481190  | -0.257323 | 7.208463  |
| H  | 0.883996  | 0.510842  | 7.891665  |
| H  | 1.025650  | -1.212254 | 7.346484  |
| H  | -0.605063 | -0.424640 | 7.385064  |
| C  | -0.954976 | -4.043410 | 4.944681  |
| O  | -2.132043 | -3.811728 | 5.220756  |
| O  | -0.473093 | -5.305605 | 4.853753  |
| C  | -1.430277 | -6.343297 | 5.108855  |
| H  | -0.875026 | -7.294744 | 5.026967  |
| H  | -2.255945 | -6.307979 | 4.369940  |
| H  | -1.865928 | -6.232911 | 6.121338  |

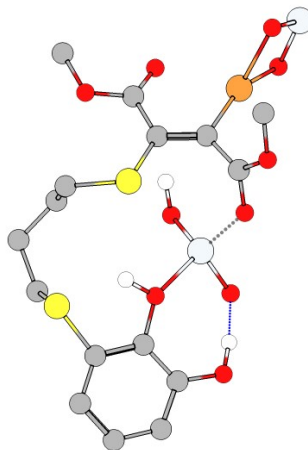

TS-2' structure (-831.33 cm<sup>-1</sup>)

Energy: -5508.27761375344 Eh

O 2

|    |           |           |           |
|----|-----------|-----------|-----------|
| Ti | -0.636109 | 2.636469  | -0.279648 |
| O  | -0.247654 | 3.988428  | -1.162156 |
| O  | -2.284733 | 2.150296  | -0.534137 |
| O  | 0.919492  | 1.313079  | -0.846220 |
| C  | 1.838434  | 1.188662  | -1.899531 |
| C  | 2.471571  | -0.069741 | -2.042351 |
| C  | 3.419930  | -0.300834 | -3.050252 |
| H  | 3.903480  | -1.284440 | -3.121641 |
| C  | 3.725496  | 0.746403  | -3.933006 |
| H  | 4.462334  | 0.592878  | -4.735793 |
| C  | 3.103353  | 1.987466  | -3.794899 |
| H  | 3.336115  | 2.821875  | -4.472607 |
| C  | 2.150001  | 2.268297  | -2.777925 |
| O  | 1.665822  | 3.503287  | -2.738497 |
| S  | 2.097493  | -1.320421 | -0.823688 |
| S  | -0.044723 | -0.723086 | 1.783354  |
| C  | -0.204578 | -2.557122 | 1.732877  |
| C  | -0.768604 | -3.196284 | 0.460328  |
| H  | -0.854657 | -2.809340 | 2.595705  |
| H  | 0.818181  | -2.926225 | 1.953895  |
| C  | 0.134160  | -3.319841 | -0.774360 |
| H  | -1.719019 | -2.694391 | 0.179696  |
| H  | -1.073819 | -4.224686 | 0.750378  |
| C  | 0.532783  | -2.033217 | -1.509800 |
| H  | -0.409949 | -3.951979 | -1.508392 |
| H  | 1.053455  | -3.893901 | -0.521102 |
| H  | -0.271051 | -1.267728 | -1.464934 |
| H  | 0.744931  | -2.243037 | -2.576049 |
| H  | 1.033111  | 0.456640  | -0.302124 |
| H  | 0.901657  | 3.688836  | -2.068016 |
| Ti | -3.802703 | -1.056821 | 5.297742  |
| Cu | -2.944603 | -0.289861 | 2.999057  |
| O  | -3.475844 | 0.549526  | 4.800707  |
| O  | -3.371209 | -1.990609 | 3.943344  |
| C  | -1.714788 | -0.219846 | 1.427710  |
| C  | -2.224118 | 1.057310  | 1.744193  |
| C  | -1.468522 | 2.120093  | 2.409888  |
| O  | -0.648656 | 2.844147  | 1.712630  |
| N  | -1.702437 | 2.445590  | 3.683562  |
| H  | -2.377885 | 1.883022  | 4.244499  |
| H  | -1.265314 | 3.290067  | 4.056597  |
| H  | -2.187511 | -0.770925 | 0.594020  |
| H  | -2.613314 | 1.611964  | 0.566945  |

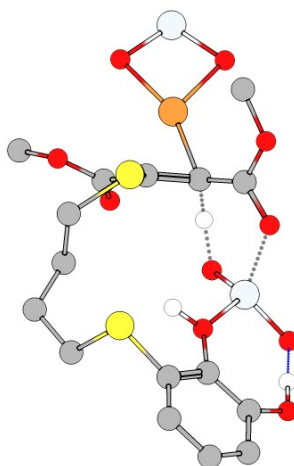

### Z-PC' structure

Energy: -5508.316933808605 Eh

O 2

|    |           |           |           |
|----|-----------|-----------|-----------|
| Ti | 0.495120  | -0.639730 | 1.597620  |
| O  | 0.502270  | 0.509660  | 0.365790  |
| O  | -0.926690 | -1.524150 | 1.601060  |
| O  | 2.202040  | -1.694030 | 0.968620  |
| C  | 3.400030  | -1.483620 | 0.296270  |
| C  | 4.432670  | -2.415970 | 0.548670  |
| C  | 5.683780  | -2.297870 | -0.076730 |
| H  | 6.476680  | -3.026140 | 0.141430  |
| C  | 5.876020  | -1.230240 | -0.968940 |
| H  | 6.845380  | -1.111310 | -1.475820 |
| C  | 4.853230  | -0.309790 | -1.218080 |
| H  | 5.002530  | 0.531150  | -1.911520 |
| C  | 3.574010  | -0.390200 | -0.600830 |
| O  | 2.666770  | 0.524440  | -0.899190 |

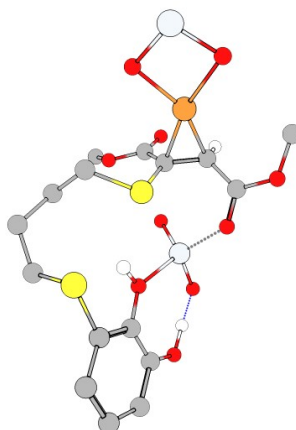

|    |           |           |           |
|----|-----------|-----------|-----------|
| S  | 4.072030  | -3.703060 | 1.743430  |
| S  | 1.197680  | -2.898220 | 3.658610  |
| C  | 1.233010  | -4.736190 | 3.577400  |
| C  | 1.075240  | -5.392310 | 2.192190  |
| H  | 0.469150  | -5.068230 | 4.308170  |
| H  | 2.221110  | -4.970440 | 4.025630  |
| C  | 2.352450  | -5.917760 | 1.511350  |
| H  | 0.535360  | -4.700960 | 1.514120  |
| H  | 0.390100  | -6.254040 | 2.332230  |
| C  | 3.156890  | -4.915770 | 0.683020  |
| H  | 2.056030  | -6.722840 | 0.805110  |
| H  | 3.014470  | -6.413610 | 2.256680  |
| H  | 2.491380  | -4.336970 | 0.009660  |
| H  | 3.911350  | -5.433420 | 0.057390  |
| H  | 2.399110  | -2.452290 | 1.614460  |
| H  | 1.752600  | 0.498490  | -0.358220 |
| Ti | -0.118750 | -4.167680 | 8.136930  |
| Cu | -0.424900 | -2.717150 | 6.038820  |
| O  | -0.144930 | -2.465500 | 7.997170  |
| O  | -0.356310 | -4.664080 | 6.524430  |
| C  | -0.503600 | -2.474590 | 4.052820  |
| C  | -0.743740 | -1.242680 | 4.731440  |
| C  | 0.160330  | -0.082550 | 4.603560  |
| O  | 0.790460  | 0.145530  | 3.546660  |
| O  | 0.270120  | 0.807880  | 5.572650  |
| H  | -1.819930 | -0.983090 | 4.804350  |
| C  | -0.425980 | 0.626460  | 6.822760  |
| H  | -0.066680 | 1.440530  | 7.476230  |
| H  | -0.203590 | -0.364610 | 7.270760  |
| H  | -1.518990 | 0.731700  | 6.669490  |
| C  | -1.751400 | -3.142220 | 3.516120  |
| O  | -2.866920 | -2.768640 | 3.830790  |
| O  | -1.491290 | -4.191370 | 2.726480  |
| C  | -2.622200 | -4.705060 | 2.010210  |
| H  | -2.261960 | -5.601370 | 1.475070  |
| H  | -2.973750 | -3.938670 | 1.291320  |
| H  | -3.445710 | -4.963340 | 2.704070  |

### Z-VS' structure

Energy: -1868.478008181368 Eh

O 2

|   |           |           |           |
|---|-----------|-----------|-----------|
| O | 2.212197  | -1.262242 | 0.772451  |
| C | 3.566543  | -1.285630 | 0.529786  |
| C | 4.401666  | -2.408143 | 0.707585  |
| C | 5.775347  | -2.306228 | 0.389611  |
| H | 6.417496  | -3.188183 | 0.526858  |
| C | 6.296466  | -1.105058 | -0.111325 |
| H | 7.366670  | -1.038934 | -0.359057 |
| C | 5.467028  | 0.006743  | -0.325008 |
| H | 5.857000  | 0.951575  | -0.729720 |
| C | 4.101713  | -0.084750 | -0.010352 |
| O | 3.260384  | 0.958248  | -0.192078 |
| S | 3.805813  | -3.956491 | 1.359617  |
| S | 1.321233  | -3.311286 | 3.233417  |
| C | 1.181188  | -5.143768 | 3.093779  |
| C | 0.720479  | -5.644205 | 1.717105  |
| H | 0.529684  | -5.516784 | 3.904786  |
| H | 2.213415  | -5.482165 | 3.318277  |
| C | 1.776861  | -5.687861 | 0.602607  |
| H | -0.151902 | -5.040375 | 1.394547  |
| H | 0.337810  | -6.678879 | 1.857052  |
| C | 2.430942  | -4.360791 | 0.198979  |
| H | 1.285409  | -6.104680 | -0.302474 |

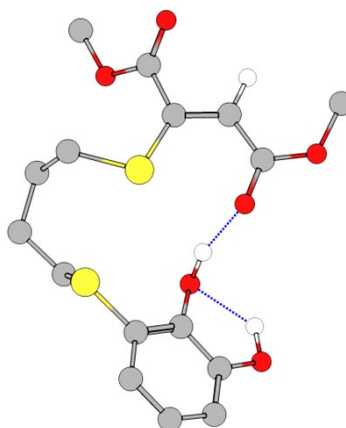

|   |           |           |           |
|---|-----------|-----------|-----------|
| H | 2.573707  | -6.418548 | 0.867615  |
| H | 1.709651  | -3.517867 | 0.204960  |
| H | 2.871809  | -4.437446 | -0.814889 |
| H | 2.033240  | -1.199496 | 1.752026  |
| H | 2.389175  | 0.607078  | 0.113662  |
| C | -0.172160 | -2.764758 | 3.966393  |
| C | -0.363516 | -1.436514 | 4.290331  |
| C | 0.599581  | -0.385222 | 3.976550  |
| O | 1.619601  | -0.563585 | 3.303652  |
| O | 0.378967  | 0.872224  | 4.436071  |
| H | -1.302979 | -1.198645 | 4.805131  |
| C | -0.724027 | 1.171757  | 5.288262  |
| H | -0.615698 | 2.236352  | 5.564890  |
| H | -0.712477 | 0.556785  | 6.212325  |
| H | -1.696096 | 1.035488  | 4.767621  |
| C | -1.345266 | -3.648370 | 4.319270  |
| O | -2.005980 | -3.526278 | 5.333316  |
| O | -1.624878 | -4.545742 | 3.347942  |
| C | -2.765087 | -5.382663 | 3.592167  |
| H | -2.843831 | -6.050283 | 2.715961  |
| H | -3.682825 | -4.770786 | 3.698771  |
| H | -2.628083 | -5.970886 | 4.521423  |

S8. Cartesians coordinates, first frequency for TS and Energies of E-RC', IN-3', TS-3', IN-4', TS-4', E-PC', E-VS' (E-vinyl sulphide derived from dimethyl acetylenedicarboxylate)

E-RC' structure

Energy: -5508.364500993257 Eh

0 2

|    |           |           |           |
|----|-----------|-----------|-----------|
| O  | 1.076977  | 1.406663  | 1.041284  |
| Ti | 0.648056  | 0.724467  | 2.683872  |
| Ti | 1.602911  | -0.327752 | 0.535335  |
| O  | 1.801427  | -0.719473 | 2.405392  |
| Cu | -1.383280 | -1.442788 | 1.658105  |
| O  | 0.271624  | -1.155608 | -0.043393 |
| O  | -0.967533 | 0.123541  | 2.764944  |
| O  | 3.201090  | -1.714327 | -0.282493 |
| C  | 3.074535  | -1.731544 | -1.647879 |
| C  | 3.207454  | -2.913929 | -2.393938 |
| C  | 3.062193  | -2.857789 | -3.794764 |
| H  | 3.180392  | -3.778588 | -4.382850 |
| C  | 2.748612  | -1.641035 | -4.415966 |
| H  | 2.626230  | -1.599435 | -5.507947 |
| C  | 2.564856  | -0.467130 | -3.658271 |
| H  | 2.284144  | 0.479604  | -4.144319 |
| C  | 2.718119  | -0.523157 | -2.272011 |
| O  | 2.507271  | 0.521494  | -1.386677 |
| S  | 3.481059  | -4.410091 | -1.455587 |
| S  | -0.203894 | -2.881452 | 3.109536  |
| C  | 0.323161  | -4.397743 | 2.208717  |
| C  | 1.036740  | -4.126727 | 0.889297  |
| H  | -0.617456 | -4.963993 | 2.050799  |
| H  | 0.948975  | -4.996933 | 2.902728  |
| C  | 1.252830  | -5.381572 | 0.042339  |
| H  | 2.013306  | -3.651734 | 1.125431  |
| H  | 0.462777  | -3.374880 | 0.309054  |
| C  | 1.744077  | -5.095610 | -1.375629 |
| H  | 0.275085  | -5.896482 | -0.082720 |
| H  | 1.928806  | -6.103043 | 0.552666  |
| H  | 1.086077  | -4.355743 | -1.872848 |
| H  | 1.756203  | -6.018388 | -1.987774 |
| H  | 0.917057  | -2.051092 | 2.858244  |

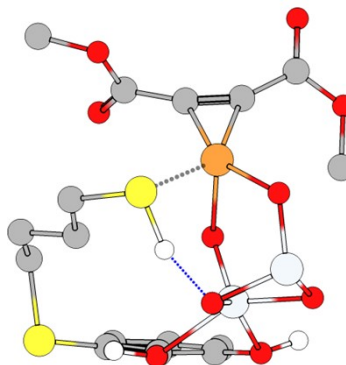



|   |           |           |           |
|---|-----------|-----------|-----------|
| H | 3.326770  | -2.675870 | -0.018760 |
| H | 2.006354  | 1.260125  | -1.785463 |
| C | -2.537702 | -2.505840 | 0.457256  |
| C | -2.442712 | -3.923482 | 0.130349  |
| O | -3.095220 | -4.679418 | 1.047828  |
| C | -3.112360 | -6.087911 | 0.785201  |
| H | -3.802928 | -6.526601 | 1.526662  |
| H | -2.100058 | -6.526960 | 0.906705  |
| H | -3.461684 | -6.294682 | -0.245715 |
| O | -1.839306 | -4.378997 | -0.828488 |
| C | -2.915636 | -1.296208 | 0.348704  |
| C | -3.838795 | -0.273919 | -0.189378 |
| O | -5.004742 | -0.547998 | -0.403120 |
| O | -3.351508 | 0.949805  | -0.444825 |
| C | -1.976123 | 1.259633  | -0.145416 |
| H | -1.808201 | 1.274777  | 0.949550  |
| H | -1.282179 | 0.519372  | -0.592794 |
| H | -1.797090 | 2.262266  | -0.572809 |

### IN-3' structure

Energy: -5508.374458821394 Eh

O 2

|    |           |           |           |
|----|-----------|-----------|-----------|
| O  | -0.098046 | 3.651071  | 1.244367  |
| Ti | -0.446128 | 3.137572  | 2.952772  |
| Ti | 0.508530  | 1.911571  | 0.825854  |
| O  | 0.860691  | 1.699113  | 2.795802  |
| Cu | -2.280055 | 0.573050  | 2.601356  |
| O  | -0.757341 | 0.958907  | 0.393154  |
| O  | -1.975276 | 2.434982  | 3.193240  |
| O  | 2.178752  | 0.577122  | 0.178212  |
| C  | 2.083911  | 0.380949  | -1.175908 |
| C  | 2.355208  | -0.865359 | -1.763606 |
| C  | 2.240302  | -0.996881 | -3.161481 |
| H  | 2.465897  | -1.965861 | -3.628463 |
| C  | 1.822633  | 0.095954  | -3.934437 |
| H  | 1.725906  | -0.010597 | -5.024606 |
| C  | 1.500206  | 1.329038  | -3.333289 |
| H  | 1.139636  | 2.174750  | -3.938402 |
| C  | 1.621529  | 1.458454  | -1.948932 |
| O  | 1.279702  | 2.578483  | -1.202012 |
| S  | 2.763256  | -2.187161 | -0.633103 |
| S  | -0.768231 | -0.464805 | 3.976315  |
| C  | -0.249730 | -2.030822 | 3.164481  |
| C  | 0.388436  | -1.843795 | 1.788953  |
| H  | -1.145961 | -2.680732 | 3.092526  |
| H  | 0.452135  | -2.537059 | 3.861208  |
| C  | 0.681922  | -3.154382 | 1.056932  |
| H  | 1.328426  | -1.262788 | 1.931618  |
| H  | -0.282167 | -1.214580 | 1.166316  |
| C  | 1.084979  | -2.983904 | -0.406020 |
| H  | -0.252280 | -3.756675 | 1.033804  |
| H  | 1.438080  | -3.761016 | 1.602966  |
| H  | 0.353804  | -2.345437 | -0.940552 |
| H  | 1.141966  | -3.959393 | -0.927175 |
| H  | 0.451310  | 0.824480  | 3.247004  |
| H  | 2.385180  | -0.332561 | 0.562365  |
| H  | 0.740351  | 3.216205  | -1.709596 |
| C  | -5.009333 | 1.182029  | 0.821794  |
| O  | -4.728974 | 2.365406  | 0.246949  |
| C  | -3.890435 | 0.395432  | 1.376957  |
| C  | -3.334003 | -0.729488 | 1.604380  |
| C  | -3.127830 | -2.160316 | 1.383667  |
| O  | -2.551834 | -2.637331 | 0.418355  |

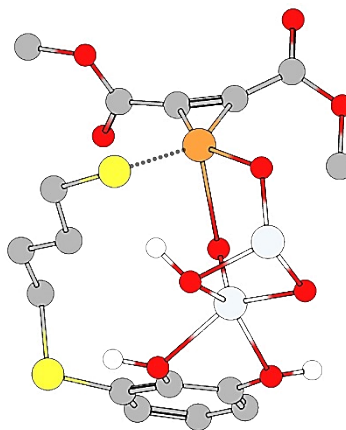

|   |           |           |           |
|---|-----------|-----------|-----------|
| O | -3.646821 | -2.890214 | 2.396939  |
| C | -3.523341 | -4.310884 | 2.260798  |
| H | -3.917118 | -4.651959 | 1.282907  |
| H | -2.461086 | -4.622759 | 2.341470  |
| H | -4.106925 | -4.747288 | 3.090211  |
| O | -6.152519 | 0.769951  | 0.882638  |
| C | -3.374684 | 2.848838  | 0.233464  |
| H | -3.394906 | 3.774354  | -0.370102 |
| H | -2.678335 | 2.110743  | -0.213446 |
| H | -3.028651 | 3.070782  | 1.261945  |

TS-3' structure (-135.24 cm<sup>-1</sup>)

Energy: -5508.336863663772 Eh

O 2

|    |           |           |           |
|----|-----------|-----------|-----------|
| O  | 1.338610  | 4.025180  | 1.676880  |
| Ti | 0.731040  | 3.142150  | 3.160880  |
| Ti | 1.510650  | 2.390110  | 0.791170  |
| O  | 1.727710  | 1.520120  | 2.618220  |
| Cu | -1.148490 | 1.729670  | 1.596790  |
| O  | 0.084340  | 1.924140  | 0.020710  |
| O  | -0.935310 | 2.905480  | 3.198600  |
| O  | 3.003150  | 1.068190  | -0.241440 |
| C  | 2.862550  | 1.254390  | -1.595980 |
| C  | 2.956990  | 0.186610  | -2.502790 |
| C  | 2.784760  | 0.444620  | -3.877560 |
| H  | 2.873330  | -0.384180 | -4.593950 |
| C  | 2.488880  | 1.744110  | -4.312040 |
| H  | 2.345220  | 1.943080  | -5.383890 |
| C  | 2.358670  | 2.804850  | -3.393820 |
| H  | 2.100900  | 3.818310  | -3.736100 |
| C  | 2.539530  | 2.549870  | -2.033580 |
| O  | 2.394100  | 3.467660  | -1.005330 |
| S  | 3.253040  | -1.423750 | -1.789990 |
| S  | -0.411760 | -0.596470 | 2.985770  |
| C  | 0.263990  | -1.914510 | 1.906930  |
| C  | 0.656330  | -1.451310 | 0.507380  |
| H  | -0.507500 | -2.710830 | 1.833620  |
| H  | 1.137160  | -2.356110 | 2.434880  |
| C  | 1.059240  | -2.602090 | -0.416560 |
| H  | 1.487920  | -0.719220 | 0.595420  |
| H  | -0.188710 | -0.890180 | 0.059040  |
| C  | 1.538120  | -2.168790 | -1.801060 |
| H  | 0.176270  | -3.262620 | -0.566570 |
| H  | 1.833900  | -3.239410 | 0.066630  |
| H  | 0.867530  | -1.405580 | -2.245100 |
| H  | 1.597120  | -3.027830 | -2.497970 |
| H  | 1.116440  | 0.694420  | 2.757120  |
| H  | 3.126520  | 0.073780  | -0.126660 |
| H  | 1.899820  | 4.264910  | -1.281430 |
| C  | -3.725160 | 1.319910  | 0.029290  |
| O  | -3.471960 | 1.030670  | -1.282000 |
| C  | -2.772640 | 0.748180  | 0.992180  |
| C  | -2.560500 | -0.289480 | 1.708500  |
| C  | -2.947210 | -1.642950 | 2.099820  |
| O  | -2.741430 | -2.628590 | 1.397460  |
| O  | -3.575310 | -1.682340 | 3.292340  |
| C  | -3.924560 | -2.990440 | 3.754690  |
| H  | -3.011130 | -3.584720 | 3.964430  |
| H  | -4.500990 | -2.840680 | 4.684710  |
| H  | -4.530570 | -3.533330 | 3.001360  |
| O  | -4.670500 | 2.020840  | 0.326730  |
| C  | -2.338260 | 0.223310  | -1.614850 |
| H  | -2.323170 | 0.166370  | -2.720080 |

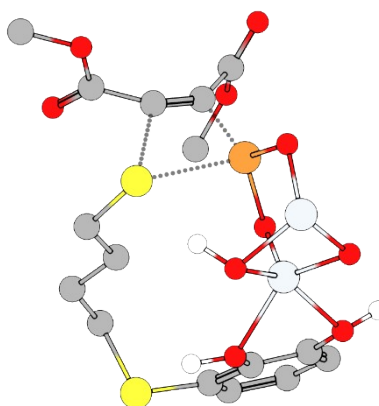

H -2.430760 -0.801720 -1.196360  
H -1.397910 0.686220 -1.246410

IN-4' structure

Energy: -5508.397872253430 Eh

O 2

|    |           |           |           |
|----|-----------|-----------|-----------|
| O  | 2.031185  | 1.608875  | 0.882991  |
| Ti | 0.975714  | 0.956431  | 2.201993  |
| Ti | 2.247645  | -0.067297 | 0.053650  |
| O  | 1.693234  | -0.852750 | 1.861191  |
| Cu | -1.340523 | -0.268331 | 1.252554  |
| O  | 1.141395  | -0.348972 | -1.115255 |
| O  | -0.702218 | 1.269335  | 2.095751  |
| O  | 3.758587  | -1.607302 | -0.589394 |
| C  | 4.026371  | -1.326912 | -1.910304 |
| C  | 4.058174  | -2.335887 | -2.885383 |
| C  | 4.358442  | -1.983201 | -4.215039 |
| H  | 4.398091  | -2.767949 | -4.983579 |
| C  | 4.565924  | -0.636193 | -4.547465 |
| H  | 4.798646  | -0.359982 | -5.585767 |
| C  | 4.436856  | 0.380907  | -3.580840 |
| H  | 4.538866  | 1.440456  | -3.860471 |
| C  | 4.144718  | 0.025538  | -2.262812 |
| O  | 3.890066  | 0.892196  | -1.209664 |
| S  | 3.605306  | -3.969817 | -2.320413 |
| S  | -0.271025 | -3.296530 | 2.207925  |
| C  | 0.974725  | -4.513846 | 1.610126  |
| C  | 1.768624  | -4.090985 | 0.369225  |
| H  | 0.460589  | -5.485286 | 1.469883  |
| H  | 1.646024  | -4.618807 | 2.486528  |
| C  | 1.147386  | -4.462784 | -0.982072 |
| H  | 2.786813  | -4.533490 | 0.433215  |
| H  | 1.892519  | -2.988607 | 0.412772  |
| C  | 1.752159  | -3.717537 | -2.170655 |
| H  | 0.070244  | -4.195876 | -0.988992 |
| H  | 1.196249  | -5.563006 | -1.133490 |
| H  | 1.580329  | -2.625005 | -2.064146 |
| H  | 1.303093  | -4.050121 | -3.126907 |
| H  | 1.041204  | -1.627171 | 1.928399  |
| H  | 3.681040  | -2.610216 | -0.546240 |
| H  | 3.679742  | 1.799277  | -1.508434 |
| C  | -3.147411 | -1.720852 | -0.307079 |
| C  | -1.467264 | -3.147890 | 0.870203  |
| C  | -1.916735 | -1.906107 | 0.517320  |
| O  | -3.006688 | -1.466977 | -1.633106 |
| O  | -4.249032 | -1.656911 | 0.210800  |
| C  | -2.073358 | -4.385345 | 0.313307  |
| C  | -1.722994 | -1.669931 | -2.228567 |
| H  | -1.807342 | -1.310972 | -3.271456 |
| H  | -1.472364 | -2.751605 | -2.233014 |
| H  | -0.921849 | -1.102059 | -1.709619 |
| O  | -2.669801 | -4.439508 | -0.753575 |
| O  | -1.881700 | -5.485951 | 1.096372  |
| C  | -2.457573 | -6.692970 | 0.585898  |
| H  | -2.204900 | -7.484903 | 1.313828  |
| H  | -2.044545 | -6.936829 | -0.414209 |
| H  | -3.557089 | -6.592919 | 0.486016  |

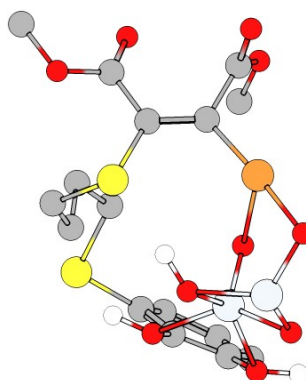

TS-4' structure (-745.67 cm<sup>-1</sup>)

Energy: -5508.3353258036 Eh

O 2

|    |          |          |          |
|----|----------|----------|----------|
| O  | 1.548600 | 3.120640 | 2.958480 |
| Ti | 0.182230 | 1.869080 | 3.251040 |

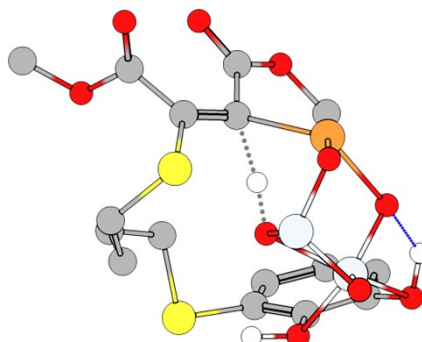

|    |           |           |           |
|----|-----------|-----------|-----------|
| Ti | 1.550390  | 2.725990  | 1.178160  |
| O  | 0.556910  | 1.001220  | 1.456740  |
| Cu | -1.449790 | 2.405930  | 1.200940  |
| O  | 0.244040  | 3.483610  | 0.331080  |
| O  | -1.333740 | 2.649240  | 3.127820  |
| O  | 3.048160  | 1.394930  | 0.185270  |
| C  | 2.851070  | 1.417220  | -1.173360 |
| C  | 2.771030  | 0.224510  | -1.918200 |
| C  | 2.560400  | 0.306210  | -3.307740 |
| H  | 2.513800  | -0.619970 | -3.899640 |
| C  | 2.385820  | 1.560660  | -3.913950 |
| H  | 2.215370  | 1.622430  | -4.998210 |
| C  | 2.389890  | 2.740080  | -3.146430 |
| H  | 2.205440  | 3.722070  | -3.606150 |
| C  | 2.603100  | 2.671790  | -1.762710 |
| O  | 2.512060  | 3.754740  | -0.906120 |
| S  | 2.793050  | -1.297660 | -0.976540 |
| S  | -1.221480 | -0.680200 | 3.022520  |
| C  | -0.109260 | -2.151650 | 2.818750  |
| C  | 0.995350  | -2.085090 | 1.751170  |
| H  | -0.770350 | -3.030960 | 2.682840  |
| H  | 0.330520  | -2.222800 | 3.832860  |
| C  | 0.593750  | -2.513320 | 0.317440  |
| H  | 1.809510  | -2.747480 | 2.112830  |
| H  | 1.408300  | -1.056910 | 1.741040  |
| C  | 0.954120  | -1.536280 | -0.797650 |
| H  | -0.505290 | -2.646750 | 0.252890  |
| H  | 1.023060  | -3.510920 | 0.081950  |
| H  | 0.519450  | -0.537520 | -0.598910 |
| H  | 0.575230  | -1.896200 | -1.775140 |
| H  | -0.451230 | 0.789290  | 0.859500  |
| H  | 2.980430  | 0.423280  | 0.442140  |
| H  | 1.533560  | 3.996590  | -0.818320 |
| C  | -2.733030 | 0.312340  | -0.689060 |
| O  | -2.490350 | 1.105250  | -1.772560 |
| C  | -1.855890 | 0.394030  | 0.545420  |
| C  | -2.095590 | -0.625100 | 1.462810  |
| C  | -3.106950 | -1.746290 | 1.367730  |
| O  | -4.219070 | -1.730940 | 1.850980  |
| O  | -2.518500 | -2.878390 | 0.858530  |
| C  | -3.283880 | -4.088140 | 0.972410  |
| H  | -2.638830 | -4.898990 | 0.581660  |
| H  | -3.542980 | -4.287700 | 2.034160  |
| H  | -4.222520 | -4.027180 | 0.385400  |
| O  | -3.690860 | -0.461710 | -0.749250 |
| C  | -1.386440 | 2.034620  | -1.811110 |
| H  | -1.330720 | 2.432950  | -2.855110 |
| H  | -0.409630 | 1.533450  | -1.577810 |
| H  | -1.533330 | 2.901140  | -1.096380 |

**E-PC' structure**

Energy: -5508.407935865346 Eh

O 2

|    |          |           |           |
|----|----------|-----------|-----------|
| O  | 3.673929 | 0.810338  | 2.026654  |
| Ti | 3.366385 | -0.392343 | 3.409058  |
| Ti | 3.303605 | -0.579291 | 0.862878  |
| O  | 3.747724 | -1.778978 | 2.238306  |
| Cu | 0.977490 | -1.015657 | 2.283590  |
| O  | 1.626272 | -0.633256 | 0.421700  |
| O  | 1.747917 | -0.456008 | 3.989190  |
| O  | 4.076262 | -2.072318 | -0.622996 |
| C  | 3.627697 | -1.713245 | -1.863722 |
| C  | 3.118530 | -2.655125 | -2.773049 |

|   |           |           |           |
|---|-----------|-----------|-----------|
| C | 2.654625  | -2.209933 | -4.027291 |
| H | 2.262990  | -2.942538 | -4.746572 |
| C | 2.679305  | -0.842217 | -4.334468 |
| H | 2.316439  | -0.495234 | -5.312343 |
| C | 3.146383  | 0.103546  | -3.398997 |
| H | 3.134023  | 1.179531  | -3.632719 |
| C | 3.604767  | -0.337748 | -2.155872 |
| O | 4.012452  | 0.471889  | -1.105243 |
| S | 3.043132  | -4.342623 | -2.184821 |
| S | -0.544174 | -2.748806 | 2.371468  |
| C | 0.750084  | -4.086798 | 2.164941  |
| C | 1.542194  | -4.015254 | 0.854922  |
| H | 0.223707  | -5.052362 | 2.299040  |
| H | 1.395234  | -3.895342 | 3.045234  |
| C | 1.011862  | -4.934433 | -0.258673 |
| H | 2.600968  | -4.250301 | 1.093082  |
| H | 1.545616  | -2.955104 | 0.515504  |
| C | 1.245974  | -4.437257 | -1.680168 |
| H | -0.087716 | -5.055577 | -0.156581 |
| H | 1.423513  | -5.960668 | -0.140125 |
| H | 0.848802  | -3.412880 | -1.817573 |
| H | 0.746360  | -5.093583 | -2.418569 |
| H | 3.889081  | -3.055897 | -0.534447 |
| H | 3.724099  | 1.396758  | -1.234263 |
| C | -1.567892 | -2.321408 | -1.613989 |
| C | -1.402383 | -2.874867 | 0.798875  |
| C | -1.029133 | -2.094154 | -0.247529 |
| O | -1.167655 | -1.460873 | -2.591268 |
| O | -2.274517 | -3.270289 | -1.920379 |
| H | -0.212687 | -1.368482 | -0.073655 |
| C | -0.419395 | -0.280816 | -2.277472 |
| H | -0.225722 | 0.217733  | -3.244621 |
| H | 0.547143  | -0.507857 | -1.781397 |
| H | -1.001058 | 0.401735  | -1.622888 |
| C | -2.430919 | -3.966817 | 0.736188  |
| O | -2.144859 | -5.150866 | 0.835729  |
| O | -3.676299 | -3.483648 | 0.626490  |
| C | -4.700856 | -4.468457 | 0.428454  |
| H | -5.661197 | -3.927161 | 0.485777  |
| H | -4.646557 | -5.260321 | 1.201973  |
| H | -4.578926 | -4.931438 | -0.571342 |

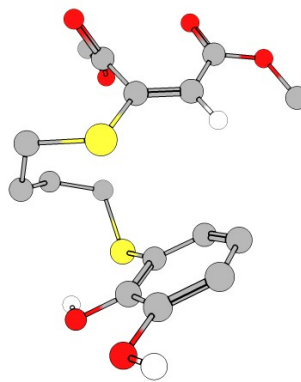

### *E-VS'* structure

Energy: -1868.482480502813 Eh

O 2

|   |          |           |           |
|---|----------|-----------|-----------|
| O | 4.694327 | -2.837196 | -0.456298 |
| C | 3.838471 | -2.127621 | -1.224816 |
| C | 2.915877 | -2.749460 | -2.097393 |
| C | 2.038850 | -1.983054 | -2.890569 |
| H | 1.353356 | -2.497455 | -3.579753 |
| C | 2.056150 | -0.588296 | -2.785023 |
| H | 1.383095 | 0.025295  | -3.402814 |
| C | 2.955936 | 0.040604  | -1.903817 |
| H | 2.974368 | 1.140875  | -1.822909 |
| C | 3.846657 | -0.709596 | -1.121202 |
| O | 4.732944 | -0.164810 | -0.245399 |
| S | 2.941689 | -4.536183 | -2.162089 |
| S | 0.708488 | -1.971701 | 0.548641  |
| C | 1.107683 | -3.329326 | 1.720347  |
| C | 2.084209 | -4.394749 | 1.212783  |
| H | 0.154615 | -3.751871 | 2.095725  |
| H | 1.565950 | -2.788040 | 2.572254  |
| C | 1.565606 | -5.424607 | 0.200309  |

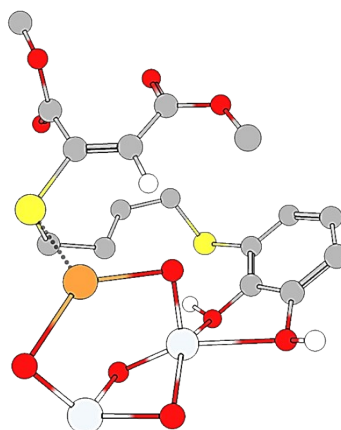

|   |           |           |           |
|---|-----------|-----------|-----------|
| H | 2.415358  | -4.951149 | 2.116719  |
| H | 2.997228  | -3.897670 | 0.826047  |
| C | 1.389427  | -4.993946 | -1.259091 |
| H | 0.580327  | -5.810286 | 0.543805  |
| H | 2.254291  | -6.295917 | 0.217256  |
| H | 0.685044  | -4.151031 | -1.384622 |
| H | 0.977005  | -5.841086 | -1.842879 |
| H | 4.513854  | -3.785114 | -0.697015 |
| H | 4.618889  | 0.803413  | -0.260903 |
| C | -2.560525 | -2.025122 | -1.890609 |
| C | -0.802028 | -2.431735 | -0.199715 |
| C | -1.220336 | -1.776247 | -1.325290 |
| O | -2.860807 | -1.459280 | -3.098460 |
| O | -3.420033 | -2.703567 | -1.347454 |
| H | -0.538901 | -1.043214 | -1.779684 |
| C | -1.898979 | -0.707188 | -3.828272 |
| H | -2.382442 | -0.431663 | -4.783714 |
| H | -0.984976 | -1.299174 | -4.049383 |
| H | -1.606735 | 0.225434  | -3.299203 |
| C | -1.676315 | -3.464001 | 0.478134  |
| O | -1.686855 | -4.615922 | -0.226252 |
| C | -2.643772 | -5.590539 | 0.212801  |
| H | -2.422515 | -6.515034 | -0.348560 |
| H | -3.662426 | -5.226354 | -0.029280 |
| H | -2.566201 | -5.761818 | 1.304753  |
| O | -2.210757 | -3.295008 | 1.555281  |

## References

- [1] F. Nador, J. Mancebo-Aracil, D. Zanotto, D. Ruiz-Molina, G. Radivoy, *RSC Adv.* **2021**, *11*, 2074–2082.
- [2] (a) F. Neese, *WIREs Comput Mol Sci*, 2012, **2**, 73-78; (b) F. Neese, *WIREs Comput Mol Sci*, 2017, **8**, e1327.
- [3] J.P. Perdew, K. Burke, M. Ernzerhof, *Phys. Rev. Lett.*, 1997, **78**, 1396.
- [4] (a) S. Grimme, S. Ehrlich, L. Goerigk, *J. Comput. Chem.*, 2011, **32**, 1456-1465; (b) S. Grimme, J. Antony, S. Ehrlich and H. Krieg, *J. Chem. Phys.*, 2010, **132**, 154104.
- [5] F. Weigend and R. Ahlrichs, *Phys. Chem.*, 2005, **7**, 3297.
- [6] V. Ásgeirsson, B.O. Birgisson, R. Bjornsson, U. Becker, F. Neese, C. Riplinger, H. Jónsson. *J Chem Theory Comput.*, 2021, **17**, 4929-4945.
- [7] C. Adamo, V. Barone, *J. Chem. Phys.*, 1999, **110**, 6158.
- [8] V. Barone, M.J. Cossi, *Phys. Chem.*, 1998, **102**, 1995.
- [9] (a) C. Lee, W. Yang, R. G. Parr, *Phys. Rev. B*, 1988, **37**, 785; (b) A. D. Becke, *Phys. Rev. A* 1988, **38**, 3098; (c) E. Miehlich, A. Savin, H. Stoll, H. Preuss, *Chem. Phys. Lett.* 1989, **157**, 200.
- [10] Chemcraft - graphical software for visualization of quantum chemistry computations, <https://www.chemcraftprog.com>, (accessed December 2022).
